# Supplementary material for: Nicotinic Acetylcholine Receptor Subunit Alpha-5 Promotes Radioresistance via Recruiting E2F Activity in Oral Squamous Cell Carcinoma
Source: J Clin Med. 2019 Sep 12;8(9):1454. doi: 10.3390/jcm8091454 (PMC6780171; doi:10.3390/jcm8091454)
Supplement: Supplementary file 1 [file jcm-08-01454-s001.xlsx]

## Sheet: OS
sample	sample_type	age_at_initial_pathologic_diagnosis	gender	pathologic_T	pathologic_N	pathologic_stage	radiation_therapy	targeted_molecular_therapy	tobacco_smoking_history	anatomic_neoplasm_subdivision	OSCC=2	CHRNA5 expression	CHRNA5_SPSS	OS	OS_time			***tobacco_smoking_history
TCGA-IQ-A61O-01	Primary Tumor	43	MALE	T2	N2b	Stage IVA	YES	YES	1	Oropharynx	1	-1.188	low	1	13.8411			Lifelong Non-smoker (less than 100 cigarettes smoked in Lifetime) = 1
TCGA-HD-8224-01	Primary Tumor	63	MALE	T3	N2c	Stage IVA	YES	YES	1	Base of tongue	1	-0.2872	low	1	14.663			Current smoker (includes daily smokers and non-daily smokers or occasional smokers) = 2
TCGA-HD-8314-01	Primary Tumor	58	MALE	T1	N1	Stage III	YES	YES	1	Base of tongue	1	-0.0218	low	0	22.0274			Current reformed smoker for > 15 years (greater than 15 years) = 3
TCGA-D6-6826-01	Primary Tumor	64	FEMALE	T4a	N2b	Stage IVA	NO	NO	1	Larynx	1	0.0849	low	1	11.4411			Current reformed smoker for ≤15 years (less than or equal to 15 years) = 4
TCGA-CR-5249-01	Primary Tumor	35	FEMALE	T2	N0	Stage II	YES	YES	1	Tonsil	1	0.1532	low	0	37.874
TCGA-CR-6470-01	Primary Tumor	38	MALE	T2	N0	Stage II	YES	YES	1	Tonsil	1	0.2022	low	0	50.0055
TCGA-IQ-7630-01	Primary Tumor	49	MALE	T2	N0	Stage II	YES	YES	1	Oropharynx	1	0.751	high	0	15.9452
TCGA-CN-A499-01	Primary Tumor	60	FEMALE	T2	N0	Stage II	NO	NO	1	Tonsil	1	0.8489	high	0	23.5726
TCGA-P3-A5QE-01	Primary Tumor	49	MALE	T2	N1	Stage III	YES	NO	1	Base of tongue	1	0.9239	high	0	51.2548
TCGA-CN-A6V7-01	Primary Tumor	40	MALE	T2	N2b	Stage IVA	YES	YES	1	Tonsil	1	0.9325	high	0	19.5288
TCGA-TN-A7HJ-01	Primary Tumor	51	MALE	T4a	N2b	Stage IVA	YES	YES	1	Larynx	1	1.3	high	0	13.2493
TCGA-BB-4223-01	Primary Tumor	48	MALE	T2	N2b	Stage IVA	YES	YES	1	Tonsil	1	1.397	high	0	105.896
TCGA-CV-7255-01	Primary Tumor	32	FEMALE	T4a	N0	Stage IVA	NO	NO	1	Oral Tongue	2	-1.446	low	1	2.10411
TCGA-CN-6996-01	Primary Tumor	58	FEMALE	T3	N2b	Stage IVA	YES	YES	1	Oral Tongue	2	-1.237	low	1	17.4247
TCGA-CQ-6220-01	Primary Tumor	69	MALE	T3	N0	Stage III	NO	NO	1	Buccal Mucosa	2	-1.204	low	1	32.3836
TCGA-BA-5557-01	Primary Tumor	41	FEMALE	T1	N1	Stage III	YES	YES	1	Oral Tongue	2	-1.131	low	0	20.4822
TCGA-CQ-6229-01	Primary Tumor	61	MALE	T2	N0	Stage II	NO	NO	1	Oral Tongue	2	-0.993	low	0	38.7616
TCGA-CR-7393-01	Primary Tumor	26	MALE	T1	N1	Stage III	YES	YES	1	Oral Tongue	2	-0.903	low	0	32.6466
TCGA-IQ-A61J-01	Primary Tumor	54	MALE	T2	N2b	Stage IVA	YES	YES	1	Oral Tongue	2	-0.8142	low	0	33.5671
TCGA-CR-6488-01	Primary Tumor	68	FEMALE	T2	N0	Stage II	NO	NO	1	Oral Tongue	2	-0.7426	low	0	12.4603
TCGA-C9-A480-01	Primary Tumor	45	FEMALE	T3	N0	Stage III	YES	NO	1	Oral Tongue	2	-0.6604	low	0	12.6904
TCGA-CQ-7069-01	Primary Tumor	77	FEMALE	T2	N0	Stage II	NO	NO	1	Alveolar Ridge	2	-0.6371	low	0	41.8849
TCGA-MT-A67F-01	Primary Tumor	60	FEMALE	T4	N0	Stage IVA	YES	YES	1	Oral Cavity	2	-0.6345	low	0	12.6247
TCGA-HD-7831-01	Primary Tumor	74	MALE	T2	N2	Stage IVA	YES	NO	1	Oral Tongue	2	-0.528	low	0	21.9288
TCGA-UF-A71E-01	Primary Tumor	63	MALE	T4a	N0	Stage IVA	YES	NO	1	Floor of mouth	2	-0.3327	low	1	49.4466
TCGA-CQ-7068-01	Primary Tumor	80	FEMALE	T2	N0	Stage II	NO	NO	1	Floor of mouth	2	-0.3224	low	0	43.0356
TCGA-CN-6013-01	Primary Tumor	56	MALE	T4a	N2b	Stage IVA	YES	YES	1	Alveolar Ridge	2	-0.3221	low	1	23.9014
TCGA-CV-A45V-01	Primary Tumor	87	FEMALE	T4	N0	Stage IVA	NO	NO	1	Oral Cavity	2	-0.2117	low	1	1.05205
TCGA-CN-4737-01	Primary Tumor	19	MALE	T2	N2b	Stage IVA	YES	YES	1	Oral Tongue	2	-0.174	low	0	20.5479
TCGA-KU-A66T-01	Primary Tumor	53	FEMALE	T4	N0	Stage IVA	YES	NO	1	Floor of mouth	2	-0.1359	low	0	18.1479
TCGA-CV-5973-01	Primary Tumor	62	FEMALE	T3	N1	Stage III	YES	NO	1	Oral Tongue	2	-0.0606	low	0	86.8274
TCGA-BB-7872-01	Primary Tumor	63	MALE	T1	N0	Stage I	YES	YES	1	Oral Tongue	2	-0.008503	low	0	38.4
TCGA-CV-A463-01	Primary Tumor	82	FEMALE	T4a	N0	Stage IVA	NO	NO	1	Floor of mouth	2	0.008497	low	1	0.756164
TCGA-C9-A47Z-01	Primary Tumor	72	FEMALE	T2	N1	Stage III	NO	NO	1	Oral Tongue	2	0.0797	low	1	6.27945
TCGA-CV-7104-01	Primary Tumor	61	FEMALE	T2	N2b	Stage IVA	NO	NO	1	Oral Tongue	2	0.1011	low	1	12.9205
TCGA-QK-A652-01	Primary Tumor	60	MALE	T1	N1	Stage III	YES	NO	1	Oral Tongue	2	0.1352	low	0	21.2055
TCGA-CQ-A4CE-01	Primary Tumor	76	FEMALE	T2	N0	Stage II	NO	NO	1	Oral Tongue	2	0.1827	low	0	29.4904
TCGA-CQ-7065-01	Primary Tumor	40	MALE	T2	N0	Stage II	NO	NO	1	Oral Tongue	2	0.2384	low	0	53.5233
TCGA-D6-6515-01	Primary Tumor	82	FEMALE	T2	N0	Stage II	YES	NO	1	Oral Tongue	2	0.2778	low	1	13.2493
TCGA-CN-4725-01	Primary Tumor	60	MALE	T2	N0	Stage II	NO	NO	1	Oral Tongue	2	0.2933	low	0	38.0384
TCGA-BA-5152-01	Primary Tumor	56	MALE	T4a	N0	Stage IVA	YES	NO	1	Alveolar Ridge	2	0.2978	low	0	42.3452
TCGA-CV-5979-01	Primary Tumor	26	MALE	T2	N2b	Stage IVA	YES	NO	1	Oral Tongue	2	0.2987	low	0	43.2329
TCGA-CN-4733-01	Primary Tumor	61	MALE	T1	N1	Stage III	NO	NO	1	Oral Tongue	2	0.361	low	0	52.1425
TCGA-CV-6953-01	Primary Tumor	80	FEMALE	T3	N0	Stage III	YES	NO	1	Floor of mouth	2	0.4027	low	1	53.9507
TCGA-CQ-5327-01	Primary Tumor	61	FEMALE	T3	N2c	Stage IVA	YES	YES	1	Oral Tongue	2	0.5165	low	0	54.5753
TCGA-CV-7238-01	Primary Tumor	69	FEMALE	T2	N0	Stage II	YES	NO	1	Oral Tongue	2	0.5246	low	0	89.6548
TCGA-CV-A6JT-01	Primary Tumor	65	MALE	T2	N0	Stage II	YES	NO	1	Oral Tongue	2	0.5495	low	0	28.011
TCGA-BB-7863-01	Primary Tumor	43	FEMALE	T3	N0	Stage III	NO	NO	1	Oral Tongue	2	0.5712	low	0	33.6986
TCGA-CV-A465-01	Primary Tumor	24	MALE	T3	N0	Stage III	NO	NO	1	Oral Tongue	2	0.6664	high	1	7.06849
TCGA-BB-A5HZ-01	Primary Tumor	65	MALE	T4a	N1	Stage IVA	YES	YES	1	Oral Cavity	2	0.6824	high	0	27.189
TCGA-CV-6959-01	Primary Tumor	48	MALE	T3	N0	Stage III	NO	NO	1	Oral Tongue	2	0.7848	high	1	8.41644
TCGA-BA-A6DB-01	Primary Tumor	24	FEMALE	T1	N0	Stage I	NO	NO	1	Oral Tongue	2	0.8646	high	0	7.10137
TCGA-CQ-7071-01	Primary Tumor	76	FEMALE	T2	N1	Stage III	YES	NO	1	Oral Cavity	2	0.8716	high	0	43.1014
TCGA-CR-6484-01	Primary Tumor	67	FEMALE	T4a	N2	Stage IVA	YES	YES	1	Oral Cavity	2	0.9038	high	0	11.6384
TCGA-CQ-A4CH-01	Primary Tumor	58	MALE	T2	N0	Stage II	YES	YES	1	Oral Tongue	2	0.9146	high	1	12.4603
TCGA-CR-7372-01	Primary Tumor	45	MALE	T1	N0	Stage I	NO	NO	1	Oral Tongue	2	0.9315	high	0	24.9534
TCGA-CQ-A4CD-01	Primary Tumor	69	MALE	T4a	N0	Stage IVA	YES	NO	1	Oral Cavity	2	0.9321	high	0	33.6
TCGA-BB-A5HU-01	Primary Tumor	47	MALE	T4	N2b	Stage IVA	YES	YES	1	Oral Cavity	2	1.119	high	0	25.7096
TCGA-RS-A6TO-01	Primary Tumor	82	FEMALE	T4	N2c	Stage IVA	YES	YES	1	Oral Cavity	2	1.192	high	1	12.7233
TCGA-CQ-5329-01	Primary Tumor	46	FEMALE	T2	N0	Stage II	NO	NO	1	Oral Tongue	2	1.474	high	0	70.4548
TCGA-MT-A67A-01	Primary Tumor	85	FEMALE	T1	N0	Stage I	NO	NO	1	Oral Tongue	2	1.635	high	0	30.0493
TCGA-CV-7252-01	Primary Tumor	62	FEMALE	T4a	N0	Stage IVA	YES	NO	1	Oral Cavity	2	1.709	high	1	4.96438
TCGA-HD-A633-01	Primary Tumor	74	MALE	T4a	N0	Stage IVA	YES	NO	1	Oral Cavity	2	1.726	high	0	13.8411
TCGA-CR-7380-01	Primary Tumor	58	MALE	T4b	N0	Stage IVB	YES	YES	1	Oral Cavity	2	1.79	high	1	19.9233
TCGA-QK-A6IH-01	Primary Tumor	65	FEMALE	T4b	N2b	Stage IVB	YES	YES	1	Alveolar Ridge	2	1.847	high	0	21.4685
TCGA-CN-6018-01	Primary Tumor	85	FEMALE	T4a	N2b	Stage IVA	NO	NO	1	Oral Cavity	2	1.868	high	1	19.0685
TCGA-CV-6003-01	Primary Tumor	50	FEMALE	T2	N1	Stage III	NO	NO	1	Oral Tongue	2	1.906	high	0	54.7397
TCGA-P3-A6T2-01	Primary Tumor	45	MALE	T3	N2b	Stage IVA	YES	YES	1	Buccal Mucosa	2	1.916	high	0	75.5507
TCGA-IQ-A6SG-01	Primary Tumor	61	FEMALE	T3	N0	Stage III	YES	NO	1	Oral Tongue	2	1.937	high	0	19.0356
TCGA-CR-7382-01	Primary Tumor	49	MALE	T2	N2c	Stage IVA	YES	YES	1	Oral Tongue	2	2.04	high	0	26.1699
TCGA-CN-A49A-01	Primary Tumor	60	MALE	T4b	N0	Stage IVB	YES	YES	1	Alveolar Ridge	2	2.307	high	1	17.2932
TCGA-D6-A6EM-01	Primary Tumor	65	FEMALE	T2	N1	Stage III	YES	NO	1	Oral Tongue	2	2.613	high	0	7.6274
TCGA-CV-5443-01	Primary Tumor	63	MALE	T3	N0	Stage III	NO	NO	2	Larynx	1	-1.071	low	0	91.5288
TCGA-CN-5355-01	Primary Tumor	64	MALE	T4a	N0	Stage IVA	NO	NO	2	Larynx	1	-0.1613	low	0	42.0164
TCGA-D6-6824-01	Primary Tumor	61	MALE	T4a	N0	Stage IVA	NO	NO	2	Larynx	1	-0.0797	low	0	2.53151
TCGA-CN-6012-01	Primary Tumor	66	MALE	T3	N2c	Stage IVA	YES	YES	2	Larynx	1	0.0728	low	0	48
TCGA-CV-5440-01	Primary Tumor	52	MALE	T4a	N2b	Stage IVA	YES	NO	2	Larynx	1	0.2003	low	0	107.507
TCGA-CV-5439-01	Primary Tumor	62	MALE	T3	N2b	Stage IVA	YES	NO	2	Base of tongue	1	0.2105	low	1	17.9507
TCGA-F7-A620-01	Primary Tumor	47	MALE	T3	N1	Stage III	NO	NO	2	Base of tongue	1	0.2193	low	0	17.8521
TCGA-CN-5360-01	Primary Tumor	68	MALE	T4a	N0	Stage IVA	YES	YES	2	Larynx	1	0.2295	low	0	71.3096
TCGA-TN-A7HI-01	Primary Tumor	56	MALE	T2	N2b	Stage IVA	YES	NO	2	Tonsil	1	0.294	low	0	13.5452
TCGA-CN-4722-01	Primary Tumor	61	FEMALE	T2	N0	Stage II	NO	NO	2	Larynx	1	0.4219	low	0	48.7562
TCGA-UF-A7J9-01	Primary Tumor	75	MALE	T4a	N0	Stage IVA	YES	NO	2	Larynx	1	0.4486	low	0	44.6466
TCGA-UF-A7JF-01	Primary Tumor	80	MALE	T4a	N2a	Stage IVA	YES	YES	2	Larynx	1	0.4665	low	0	55.4301
TCGA-F7-A61V-01	Primary Tumor	54	MALE	T2	N0	Stage II	NO	NO	2	Base of tongue	1	0.5018	low	0	24.9534
TCGA-BB-4217-01	Primary Tumor	68	MALE	T4a	N2c	Stage IVA	YES	NO	2	Larynx	1	0.5827	low	0	6.14795
TCGA-CV-A468-01	Primary Tumor	42	MALE	T4a	N2a	Stage IVA	YES	NO	2	Lip	1	0.6319	low	1	15.2548
TCGA-F7-7848-01	Primary Tumor	47	MALE	T4a	N1	Stage IVA	YES	NO	2	Larynx	1	0.6459	low	0	37.1836
TCGA-UF-A7JJ-01	Primary Tumor	68	MALE	T4a	N0	Stage IVA	YES	YES	2	Larynx	1	0.7878	high	0	18.0493
TCGA-MT-A51W-01	Primary Tumor	52	FEMALE	T1	N0	Stage I	YES	NO	2	Tonsil	1	0.8163	high	0	14.3671
TCGA-BB-7861-01	Primary Tumor	56	MALE	T1	N1	Stage III	YES	YES	2	Base of tongue	1	0.9558	high	0	22.4219
TCGA-F7-A623-01	Primary Tumor	70	MALE	T1	N2b	Stage IVA	YES	NO	2	Larynx	1	0.9777	high	0	20.2521
TCGA-BB-7871-01	Primary Tumor	64	FEMALE	T4a	N2c	Stage IVA	YES	NO	2	Base of tongue	1	0.9902	high	0	24.6575
TCGA-CN-6989-01	Primary Tumor	64	MALE	T3	N2c	Stage IVA	YES	YES	2	Larynx	1	1.017	high	1	32.2192
TCGA-CV-7261-01	Primary Tumor	57	MALE	T4a	N0	Stage IVA	YES	NO	2	Larynx	1	1.097	high	0	49.7096
TCGA-UF-A71D-01	Primary Tumor	54	FEMALE	T4a	N0	Stage IVA	YES	NO	2	Larynx	1	1.107	high	0	48.0329
TCGA-CN-5374-01	Primary Tumor	56	FEMALE	T2	N2	Stage IVA	YES	YES	2	Tonsil	1	1.268	high	1	56.9425
TCGA-CV-7433-01	Primary Tumor	49	MALE	T4a	N2b	Stage IVA	YES	YES	2	Larynx	1	1.335	high	1	19.7589
TCGA-KU-A66S-01	Primary Tumor	69	FEMALE	T1	N1	Stage III	YES	NO	2	Larynx	1	1.346	high	1	13.3479
TCGA-BA-A8YP-01	Primary Tumor	50	MALE	T4a	N3	Stage IVB	YES	YES	2	Oropharynx	1	1.431	high	0	16.4055
TCGA-CN-5366-01	Primary Tumor	51	MALE	T4a	N2c	Stage IVA	YES	YES	2	Hypopharynx	1	1.441	high	1	11.8356
TCGA-CR-7383-01	Primary Tumor	79	FEMALE	T1	N0	Stage I	NO	NO	2	Tonsil	1	1.463	high	1	17.1288
TCGA-CV-A45W-01	Primary Tumor	75	MALE	T2	N0	Stage II	NO	NO	2	Larynx	1	1.556	high	1	45.9616
TCGA-T3-A92M-01	Primary Tumor	52	MALE	T4a	N2c	Stage IVA	YES	YES	2	Larynx	1	1.602	high	0	13.7096
TCGA-CN-A63T-01	Primary Tumor	60	MALE	T3	N2b	Stage IVA	YES	YES	2	Larynx	1	1.617	high	0	7.39726
TCGA-CR-7364-01	Primary Tumor	66	MALE	T3	N0	Stage III	NO	NO	2	Larynx	1	1.634	high	0	47.1781
TCGA-CN-6022-01	Primary Tumor	49	MALE	T4a	N1	Stage IVA	NO	NO	2	Larynx	1	1.669	high	1	9.23836
TCGA-CN-6992-01	Primary Tumor	61	MALE	T3	N2b	Stage IVA	YES	YES	2	Larynx	1	1.709	high	0	35.0466
TCGA-CN-6010-01	Primary Tumor	53	MALE	T4a	N2c	Stage IVA	YES	YES	2	Larynx	1	1.754	high	0	50.0712
TCGA-BA-6869-01	Primary Tumor	62	MALE	T3	N0	Stage III	YES	NO	2	Larynx	1	1.767	high	0	21.1726
TCGA-CV-A45Z-01	Primary Tumor	75	MALE	T1	N0	Stage II	NO	NO	2	Larynx	1	1.808	high	1	48.1973
TCGA-D6-6827-01	Primary Tumor	55	FEMALE	T1	N0	Stage I	NO	NO	2	Lip	1	1.837	high	0	18.674
TCGA-HD-7753-01	Primary Tumor	62	MALE	T1	N0	Stage I	YES	YES	2	Oropharynx	1	1.933	high	0	28.4712
TCGA-CR-7371-01	Primary Tumor	45	FEMALE	T3	N1	Stage III	NO	NO	2	Larynx	1	1.976	high	1	3.09041
TCGA-CR-6474-01	Primary Tumor	51	MALE	T2	N2b	Stage IVA	YES	NO	2	Larynx	1	2.001	high	1	18.5425
TCGA-MZ-A7D7-01	Primary Tumor	51	MALE	T3	N2b	Stage IVA	YES	YES	2	Base of tongue	1	2.038	high	0	17.9836
TCGA-CR-7399-01	Primary Tumor	60	FEMALE	T3	N2c	Stage IVA	YES	YES	2	Larynx	1	2.277	high	0	5.95068
TCGA-CN-4735-01	Primary Tumor	52	MALE	T3	N2b	Stage IVA	YES	YES	2	Larynx	1	2.313	high	0	57.1068
TCGA-CN-5356-01	Primary Tumor	56	MALE	T3	N0	Stage III	NO	NO	2	Larynx	1	2.314	high	0	46.3233
TCGA-BB-7870-01	Primary Tumor	58	MALE	T4a	N0	Stage IVA	YES	NO	2	Larynx	1	2.437	high	0	66.2795
TCGA-CR-7398-01	Primary Tumor	53	FEMALE	T2	N0	Stage II	NO	NO	2	Larynx	1	2.601	high	0	5.12877
TCGA-BB-A5HY-01	Primary Tumor	64	MALE	T3	N2b	Stage IVA	YES	YES	2	Hypopharynx	1	3.419	high	1	10.5534
TCGA-CN-6998-01	Primary Tumor	53	MALE	T3	N2b	Stage IVA	YES	YES	2	Oral Tongue	2	-2.283	low	1	11.737
TCGA-QK-A8Z9-01	Primary Tumor	56	MALE	T4a	N2b	Stage IVA	YES	YES	2	Floor of mouth	2	-1.728	low	1	14.7616
TCGA-QK-A6II-01	Primary Tumor	52	MALE	T4a	N2c	Stage IVA	YES	YES	2	Floor of mouth	2	-1.301	low	1	9.33699
TCGA-CN-6016-01	Primary Tumor	64	MALE	T4a	N1	Stage IVA	YES	YES	2	Floor of mouth	2	-1.295	low	0	47.4411
TCGA-CR-7369-01	Primary Tumor	59	MALE	T4a	N2b	Stage IVA	NO	NO	2	Oral Cavity	2	-1.089	low	1	35.8356
TCGA-CV-6934-01	Primary Tumor	66	FEMALE	T3	N2b	Stage IVA	NO	NO	2	Oral Tongue	2	-0.9079	low	1	2.13699
TCGA-F7-A50G-01	Primary Tumor	66	MALE	T3	N1	Stage III	YES	NO	2	Oral Tongue	2	-0.7196	low	0	20.2521
TCGA-CR-7394-01	Primary Tumor	70	MALE	T4a	N0	Stage IVA	YES	NO	2	Oral Tongue	2	-0.3986	low	0	44.2521
TCGA-CN-5364-01	Primary Tumor	55	MALE	T4a	N2c	Stage IVA	YES	YES	2	Floor of mouth	2	-0.2924	low	1	16.2082
TCGA-CN-4728-01	Primary Tumor	56	MALE	T3	N2b	Stage IVA	YES	YES	2	Oral Cavity	2	-0.1257	low	0	56.6795
TCGA-CN-6020-01	Primary Tumor	58	MALE	T2	N1	Stage III	YES	NO	2	Oral Cavity	2	-0.0737	low	1	6.73973
TCGA-CV-A6JZ-01	Primary Tumor	68	MALE	T2	N0	Stage II	YES	NO	2	Oral Cavity	2	0.0437	low	0	23.474
TCGA-HD-8635-01	Primary Tumor	61	FEMALE	T1	N1	Stage III	NO	NO	2	Oral Tongue	2	0.0527	low	0	22.8493
TCGA-CV-7435-01	Primary Tumor	57	FEMALE	T3	N2b	Stage IVA	YES	NO	2	Oral Cavity	2	0.1514	low	1	153.863
TCGA-UF-A71B-01	Primary Tumor	50	MALE	T4	N0	Stage IVA	YES	NO	2	Alveolar Ridge	2	0.1661	low	0	49.5123
TCGA-CV-6940-01	Primary Tumor	80	FEMALE	T2	N1	Stage III	NO	NO	2	Buccal Mucosa	2	0.193	low	1	26.4329
TCGA-CN-4742-01	Primary Tumor	48	FEMALE	T4a	N2b	Stage IVA	YES	YES	2	Oral Tongue	2	0.237	low	1	13.0521
TCGA-CR-6492-01	Primary Tumor	78	MALE	T2	N1	Stage III	YES	NO	2	Hard Palate	2	0.3246	low	0	15.7479
TCGA-CV-A45X-01	Primary Tumor	47	MALE	T2	N2b	Stage IVA	YES	NO	2	Floor of mouth	2	0.333	low	1	6.50959
TCGA-HD-8634-01	Primary Tumor	51	FEMALE	T1	N0	Stage I	NO	NO	2	Oral Tongue	2	0.4083	low	1	12.6575
TCGA-CX-7219-01	Primary Tumor	47	MALE	T4a	N2c	Stage IVA	YES	YES	2	Floor of mouth	2	0.4549	low	0	34.3562
TCGA-CN-4726-01	Primary Tumor	68	MALE	T3	N2b	Stage IVA	NO	NO	2	Buccal Mucosa	2	0.4935	low	1	4.66849
TCGA-MT-A51X-01	Primary Tumor	30	MALE	T1	N2b	Stage IVA	YES	NO	2	Oral Tongue	2	0.5427	low	0	7.95616
TCGA-CV-5436-01	Primary Tumor	65	MALE	T3	N2b	Stage IVA	NO	NO	2	Floor of mouth	2	0.5741	low	1	19.2
TCGA-CV-6936-01	Primary Tumor	68	MALE	T4a	N2c	Stage IVA	YES	NO	2	Floor of mouth	2	0.5937	low	1	5.45753
TCGA-CQ-6228-01	Primary Tumor	71	FEMALE	T1	N2b	Stage IVA	YES	NO	2	Floor of mouth	2	0.6805	high	1	14.9918
TCGA-T3-A92N-01	Primary Tumor	79	MALE	T2	N2c	Stage IVA	NO	NO	2	Floor of mouth	2	0.693	high	1	3.12329
TCGA-D6-A4ZB-01	Primary Tumor	61	MALE	T3	N0	Stage III	YES	NO	2	Oral Tongue	2	0.7198	high	0	12.3616
TCGA-CN-4730-01	Primary Tumor	62	MALE	T4a	N1	Stage IVA	NO	NO	2	Floor of mouth	2	0.7679	high	0	26.8603
TCGA-CV-6956-01	Primary Tumor	67	MALE	T3	N1	Stage III	NO	NO	2	Oral Tongue	2	0.7809	high	1	7.13425
TCGA-CV-5971-01	Primary Tumor	60	MALE	T4a	N2a	Stage IVA	NO	NO	2	Oral Tongue	2	0.7814	high	0	23.0466
TCGA-CX-7086-01	Primary Tumor	53	MALE	T3	N1	Stage III	YES	YES	2	Floor of mouth	2	0.8052	high	0	18.8384
TCGA-UF-A7JC-01	Primary Tumor	42	MALE	T3	N2b	Stage IVA	YES	YES	2	Floor of mouth	2	0.8232	high	1	17.9507
TCGA-CN-6995-01	Primary Tumor	78	MALE	T4a	N0	Stage IVA	NO	NO	2	Floor of mouth	2	0.8315	high	1	3.68219
TCGA-CQ-6219-01	Primary Tumor	50	FEMALE	T3	N2a	Stage IVA	NO	NO	2	Oral Tongue	2	0.8561	high	1	15.7479
TCGA-KU-A6H8-01	Primary Tumor	41	MALE	T2	N2b	Stage IVA	YES	YES	2	Oral Tongue	2	0.9513	high	1	10.7507
TCGA-F7-8489-01	Primary Tumor	48	MALE	T2	N0	Stage II	NO	NO	2	Floor of mouth	2	1.001	high	0	21.6329
TCGA-CN-A63V-01	Primary Tumor	59	MALE	T4a	N0	Stage IVA	NO	NO	2	Buccal Mucosa	2	1.011	high	0	22.3233
TCGA-WA-A7H4-01	Primary Tumor	69	MALE	T2	N0	Stage II	NO	NO	2	Oral Tongue	2	1.015	high	0	14.5644
TCGA-CR-7367-01	Primary Tumor	52	MALE	T4a	N1	Stage IVA	YES	YES	2	Oral Cavity	2	1.018	high	0	47.3425
TCGA-BA-5149-01	Primary Tumor	47	MALE	T3	N2c	Stage IVA	YES	YES	2	Floor of mouth	2	1.06	high	1	26.4986
TCGA-UF-A7JS-01	Primary Tumor	59	MALE	T4a	N2b	Stage IVA	YES	NO	2	Oral Tongue	2	1.115	high	1	22.3562
TCGA-CQ-7072-01	Primary Tumor	51	MALE	T2	N0	Stage II	YES	NO	2	Floor of mouth	2	1.129	high	0	77.5562
TCGA-HD-7832-01	Primary Tumor	52	MALE	T4a	N0	Stage IVA	YES	NO	2	Floor of mouth	2	1.149	high	0	27.4849
TCGA-CN-5369-01	Primary Tumor	90	FEMALE	T4a	N0	Stage IVA	NO	NO	2	Hard Palate	2	1.191	high	1	12.4932
TCGA-CR-6491-01	Primary Tumor	60	MALE	T4a	N2b	Stage IVA	YES	YES	2	Floor of mouth	2	1.2	high	0	22.7836
TCGA-CR-7365-01	Primary Tumor	60	MALE	T4a	N0	Stage IVA	YES	YES	2	Oral Cavity	2	1.2	high	0	39.1562
TCGA-HD-7917-01	Primary Tumor	62	MALE	T2	N0	Stage II	NO	NO	2	Floor of mouth	2	1.205	high	1	27.4849
TCGA-CN-5359-01	Primary Tumor	59	MALE	T4a	N2b	Stage IVA	YES	YES	2	Floor of mouth	2	1.252	high	1	12.3945
TCGA-BA-7269-01	Primary Tumor	61	MALE	T2	N1	Stage III	YES	NO	2	Oral Tongue	2	1.274	high	0	41.8521
TCGA-CV-6433-01	Primary Tumor	57	MALE	T2	N0	Stage II	YES	YES	2	Oral Tongue	2	1.329	high	0	21.074
TCGA-CQ-A4CB-01	Primary Tumor	59	MALE	T1	N1	Stage III	NO	NO	2	Floor of mouth	2	1.462	high	0	29.3589
TCGA-UF-A719-01	Primary Tumor	54	MALE	T2	N0	Stage II	NO	NO	2	Floor of mouth	2	1.624	high	0	54.674
TCGA-CV-A45U-01	Primary Tumor	59	MALE	T4	N2b	Stage IVA	YES	NO	2	Oral Cavity	2	1.625	high	1	35.474
TCGA-H7-8502-01	Primary Tumor	50	MALE	T4a	N2b	Stage IVA	YES	YES	2	Oral Cavity	2	1.639	high	0	15.0575
TCGA-UF-A7JA-01	Primary Tumor	66	FEMALE	T4a	N1	Stage IVA	YES	NO	2	Buccal Mucosa	2	1.677	high	0	74.4658
TCGA-UF-A7JD-01	Primary Tumor	71	MALE	T4	N2b	Stage IVA	YES	NO	2	Buccal Mucosa	2	1.708	high	1	24.2959
TCGA-CV-6941-01	Primary Tumor	51	MALE	T3	N0	Stage III	YES	NO	2	Oral Tongue	2	1.751	high	1	11.2438
TCGA-CQ-A4C9-01	Primary Tumor	56	MALE	T2	N1	Stage III	YES	NO	2	Floor of mouth	2	1.891	high	0	23.2438
TCGA-CR-7390-01	Primary Tumor	67	MALE	T4a	N0	Stage IVA	YES	NO	2	Oral Tongue	2	2.014	high	0	49.5781
TCGA-BA-6873-01	Primary Tumor	28	MALE	T4a	N2b	Stage IVA	NO	NO	2	Oral Tongue	2	2.019	high	0	4.01096
TCGA-BA-4075-01	Primary Tumor	49	MALE	T3	N0	Stage III	NO	NO	2	Oral Tongue	2	2.036	high	1	9.30411
TCGA-D6-6823-01	Primary Tumor	50	MALE	T2	N0	Stage II	NO	NO	2	Oral Tongue	2	2.04	high	0	23.0466
TCGA-QK-AA3K-01	Primary Tumor	60	MALE	T3	N2b	Stage IVA	YES	YES	2	Oral Tongue	2	2.141	high	0	8.31781
TCGA-H7-8501-01	Primary Tumor	54	MALE	T4a	N1	Stage IVA	YES	YES	2	Buccal Mucosa	2	2.191	high	0	15.1562
TCGA-QK-A8Z7-01	Primary Tumor	59	MALE	T4a	N2c	Stage IVA	YES	YES	2	Floor of mouth	2	2.378	high	0	12.8877
TCGA-IQ-A61E-01	Primary Tumor	55	FEMALE	T3	N0	Stage III	YES	YES	2	Oral Tongue	2	2.525	high	0	37.7096
TCGA-BA-4074-01	Primary Tumor	69	MALE	T2	N2c	Stage IVA	YES	YES	2	Oral Tongue	2	3.034	high	1	15.189
TCGA-CV-A460-01	Primary Tumor	72	MALE	T1	N2	Stage II	YES	NO	3	Larynx	1	-1.19	low	1	60.4274
TCGA-CV-5430-01	Primary Tumor	61	MALE	T4a	N2a	Stage IVA	YES	NO	3	Larynx	1	0.2146	low	0	139.43
TCGA-QK-A8ZB-01	Primary Tumor	68	MALE	T4a	N0	Stage IVA	YES	NO	3	Larynx	1	0.4035	low	0	17.8192
TCGA-F7-8298-01	Primary Tumor	58	MALE	T1	N0	Stage I	NO	NO	3	Larynx	1	0.6404	low	0	32.7123
TCGA-HD-7229-01	Primary Tumor	60	MALE	T4a	N0	Stage IVA	YES	YES	3	Larynx	1	0.9115	high	0	33.7644
TCGA-CV-7421-01	Primary Tumor	76	MALE	T4a	N0	Stage IVA	NO	NO	3	Larynx	1	0.9621	high	1	0.0657534
TCGA-CV-7250-01	Primary Tumor	64	MALE	T4a	N0	Stage IVA	YES	NO	3	Larynx	1	1.347	high	1	95.3425
TCGA-BB-4227-01	Primary Tumor	66	MALE	T4a	N2b	Stage IVA	NO	NO	3	Hypopharynx	1	1.558	high	0	4.40548
TCGA-CV-5434-01	Primary Tumor	60	MALE	T4a	N2b	Stage IVA	YES	NO	3	Larynx	1	1.654	high	1	108.953
TCGA-CN-6023-01	Primary Tumor	73	MALE	T3	N2c	Stage IVA	YES	YES	3	Larynx	1	1.758	high	0	52.0767
TCGA-P3-A6T5-01	Primary Tumor	79	FEMALE	T4a	N0	Stage IVA	NO	NO	3	Alveolar Ridge	2	-2.682	low	1	28.9973
TCGA-CR-7386-01	Primary Tumor	69	MALE	T4a	N2c	Stage IVA	YES	YES	3	Oral Cavity	2	-1.821	low	0	47.0137
TCGA-IQ-7631-01	Primary Tumor	60	FEMALE	T2	N0	Stage II	NO	NO	3	Buccal Mucosa	2	-1.277	low	0	38.5315
TCGA-CV-7183-01	Primary Tumor	53	MALE	T2	N0	Stage II	NO	NO	3	Oral Cavity	2	-0.692	low	0	130.882
TCGA-CR-7395-01	Primary Tumor	80	FEMALE	T2	N0	Stage II	NO	NO	3	Oral Cavity	2	-0.585	low	0	30.5753
TCGA-CN-6017-01	Primary Tumor	55	MALE	T3	N2b	Stage IVA	YES	YES	3	Oral Tongue	2	-0.4802	low	1	28.0438
TCGA-CQ-6223-01	Primary Tumor	69	MALE	T2	N0	Stage II	NO	NO	3	Alveolar Ridge	2	-0.4775	low	0	46.9479
TCGA-CR-7392-01	Primary Tumor	67	FEMALE	T3	N2b	Stage IVA	YES	NO	3	Oral Tongue	2	-0.3081	low	0	46.8493
TCGA-CR-7376-01	Primary Tumor	83	MALE	T2	N1	Stage III	NO	NO	3	Oral Cavity	2	-0.2801	low	0	31.9562
TCGA-CR-7391-01	Primary Tumor	36	FEMALE	T1	N0	Stage I	NO	NO	3	Oral Tongue	2	-0.0809	low	0	30.0164
TCGA-D6-A4Z9-01	Primary Tumor	59	MALE	T2	N2	Stage IVA	YES	NO	3	Oral Tongue	2	0.1923	low	0	17.7205
TCGA-CX-7085-01	Primary Tumor	77	FEMALE	T1	N0	Stage I	NO	NO	3	Oral Tongue	2	0.2306	low	0	10.5534
TCGA-BA-5151-01	Primary Tumor	72	MALE	T4a	N0	Stage IVA	YES	NO	3	Buccal Mucosa	2	0.3446	low	0	23.737
TCGA-CQ-6222-01	Primary Tumor	63	MALE	T2	N2b	Stage IVA	YES	YES	3	Oral Tongue	2	0.4175	low	0	66.2795
TCGA-CQ-5333-01	Primary Tumor	74	MALE	T2	N0	Stage II	NO	NO	3	Oral Tongue	2	0.4534	low	1	11.211
TCGA-CR-7373-01	Primary Tumor	66	MALE	T4a	N1	Stage IVA	YES	YES	3	Oral Cavity	2	0.5803	low	0	29.2274
TCGA-CQ-5323-01	Primary Tumor	82	MALE	T1	N0	Stage I	YES	NO	3	Alveolar Ridge	2	0.7156	high	0	48.1973
TCGA-CV-7414-01	Primary Tumor	78	MALE	T4a	N2b	Stage IVA	NO	NO	3	Oral Cavity	2	0.8038	high	1	0.460274
TCGA-CQ-5330-01	Primary Tumor	69	FEMALE	T3	N2b	Stage IVA	YES	YES	3	Oral Tongue	2	0.85	high	0	62.3671
TCGA-CN-6994-01	Primary Tumor	67	MALE	T4a	N0	Stage IVA	NO	NO	3	Oral Cavity	2	0.9074	high	0	38.8932
TCGA-CV-7235-01	Primary Tumor	67	MALE	T2	N0	Stage II	YES	NO	3	Floor of mouth	2	1.168	high	0	77.1616
TCGA-CR-6493-01	Primary Tumor	69	MALE	T3	N2b	Stage IVA	YES	YES	3	Oral Tongue	2	1.271	high	1	9.27123
TCGA-IQ-7632-01	Primary Tumor	68	FEMALE	T4a	N0	Stage IVA	YES	NO	3	Alveolar Ridge	2	1.37	high	0	14.4986
TCGA-HD-A6I0-01	Primary Tumor	56	MALE	T4a	N1	Stage IVA	YES	NO	3	Oral Cavity	2	1.389	high	0	6.90411
TCGA-CQ-5334-01	Primary Tumor	87	MALE	T3	N2b	Stage IVA	NO	NO	3	Buccal Mucosa	2	1.469	high	1	4.2411
TCGA-CV-6436-01	Primary Tumor	62	MALE	T4a	N0	Stage IVA	NO	NO	3	Oral Tongue	2	1.537	high	0	62.4329
TCGA-IQ-A6SH-01	Primary Tumor	55	MALE	T2	N1	Stage III	YES	NO	3	Oral Tongue	2	1.588	high	0	15.4849
TCGA-CQ-6227-01	Primary Tumor	77	MALE	T3	N2c	Stage IVA	NO	NO	3	Oral Cavity	2	1.743	high	1	4.2411
TCGA-CR-7379-01	Primary Tumor	78	FEMALE	T4a	N2b	Stage IVA	YES	NO	3	Oral Cavity	2	2.153	high	0	34.0603
TCGA-QK-AA3J-01	Primary Tumor	69	MALE	T1	N0	Stage I	YES	NO	4	Larynx	1	-1.52	low	0	15.3205
TCGA-CN-A6UY-01	Primary Tumor	57	MALE	T3	N2b	Stage IVA	YES	YES	4	Base of tongue	1	-1.131	low	0	23.4411
TCGA-CN-A6V6-01	Primary Tumor	59	MALE	T2	N2b	Stage IVA	YES	YES	4	Base of tongue	1	-0.5179	low	0	20.8767
TCGA-CV-5444-01	Primary Tumor	64	MALE	T4a	N1	Stage IVA	NO	NO	4	Larynx	1	-0.3203	low	0	80.1205
TCGA-CR-6487-01	Primary Tumor	50	MALE	T1	N0	Stage I	NO	NO	4	Tonsil	1	-0.2626	low	0	7.69315
TCGA-CV-A6K1-01	Primary Tumor	65	MALE	T4a	N0	Stage IVA	YES	NO	4	Larynx	1	0.0486	low	0	22.5205
TCGA-CN-4739-01	Primary Tumor	71	MALE	T4a	N0	Stage IVA	YES	YES	4	Larynx	1	0.0761	low	1	45.8301
TCGA-CN-A6V3-01	Primary Tumor	61	MALE	T3	N2b	Stage IVA	YES	YES	4	Larynx	1	0.1612	low	0	24.3945
TCGA-BB-A6UM-01	Primary Tumor	52	MALE	T1	N2	Stage III	YES	YES	4	Tonsil	1	0.2511	low	0	12.9205
TCGA-CV-5431-01	Primary Tumor	73	MALE	T3	N2c	Stage IVA	YES	NO	4	Larynx	1	0.2718	low	1	17.1616
TCGA-CV-A45Y-01	Primary Tumor	61	MALE	T4a	N0	Stage IVA	YES	NO	4	Larynx	1	0.2927	low	1	88.8658
TCGA-BB-7864-01	Primary Tumor	61	MALE	T2	N2c	Stage IVA	YES	YES	4	Larynx	1	0.4575	low	0	50.2027
TCGA-D6-A6EK-01	Primary Tumor	67	MALE	T2	N1	Stage III	YES	YES	4	Larynx	1	0.4708	low	0	28.7671
TCGA-UF-A7JH-01	Primary Tumor	59	MALE	T4a	N0	Stage IVA	YES	NO	4	Larynx	1	0.4809	low	0	29.4575
TCGA-CV-5441-01	Primary Tumor	58	MALE	T4a	N2b	Stage IVA	YES	NO	4	Larynx	1	0.6418	low	0	94.8822
TCGA-D6-6516-01	Primary Tumor	69	MALE	T1	N0	Stage I	NO	NO	4	Lip	1	0.6542	low	0	25.4137
TCGA-D6-A74Q-01	Primary Tumor	67	MALE	T4a	N0	Stage IVA	YES	NO	4	Larynx	1	0.7758	high	0	23.3425
TCGA-CR-6467-01	Primary Tumor	59	MALE	T2	N1	Stage III	YES	NO	4	Tonsil	1	0.9628	high	0	58.4219
TCGA-QK-A6VC-01	Primary Tumor	62	FEMALE	T4a	N1	Stage IVA	YES	NO	4	Hypopharynx	1	1.101	high	0	19.726
TCGA-CN-A498-01	Primary Tumor	61	FEMALE	T3	N0	Stage III	YES	YES	4	Base of tongue	1	1.103	high	1	25.4137
TCGA-CN-A497-01	Primary Tumor	63	MALE	T1	N1	Stage III	NO	NO	4	Larynx	1	1.107	high	0	35.0137
TCGA-KU-A6H7-01	Primary Tumor	55	FEMALE	T2	N2a	Stage IVA	YES	YES	4	Tonsil	1	1.266	high	0	19.2658
TCGA-CN-4727-01	Primary Tumor	56	MALE	T4a	N0	Stage IVA	YES	YES	4	Larynx	1	1.325	high	0	51.2877
TCGA-CN-A49B-01	Primary Tumor	71	MALE	T3	N1	Stage III	YES	NO	4	Larynx	1	1.511	high	0	29.7205
TCGA-CN-A63W-01	Primary Tumor	48	FEMALE	T4a	N2c	Stage IVA	YES	YES	4	Larynx	1	1.561	high	1	12.3945
TCGA-BA-5555-01	Primary Tumor	54	MALE	T3	N2c	Stage IVA	NO	NO	4	Larynx	1	1.594	high	0	17.0959
TCGA-CV-5435-01	Primary Tumor	57	MALE	T4a	N2b	Stage IVA	YES	YES	4	Larynx	1	1.675	high	1	76.2411
TCGA-CV-6950-01	Primary Tumor	64	MALE	T3	N2c	Stage IVA	YES	NO	4	Base of tongue	1	1.676	high	1	15.0904
TCGA-CV-7422-01	Primary Tumor	60	FEMALE	T4a	N1	Stage IVA	YES	NO	4	Larynx	1	1.676	high	1	34.0932
TCGA-TN-A7HL-01	Primary Tumor	59	MALE	T3	N2b	Stage IVA	YES	YES	4	Hypopharynx	1	1.703	high	0	20.3507
TCGA-BB-7862-01	Primary Tumor	67	MALE	T3	N2c	Stage IVA	YES	NO	4	Larynx	1	1.752	high	0	36.7233
TCGA-CV-5432-01	Primary Tumor	68	MALE	T3	N0	Stage III	NO	NO	4	Larynx	1	1.844	high	0	129.205
TCGA-CN-6997-01	Primary Tumor	66	MALE	T3	N2c	Stage IVA	YES	YES	4	Larynx	1	1.856	high	1	32.4822
TCGA-CN-4723-01	Primary Tumor	67	MALE	T4a	N0	Stage IVA	NO	NO	4	Larynx	1	2.091	high	0	55.8575
TCGA-P3-A5Q6-01	Primary Tumor	49	MALE	T4a	N2b	Stage IVA	YES	YES	4	Tonsil	1	2.255	high	1	15.7808
TCGA-CN-A63U-01	Primary Tumor	50	MALE	T3	N2b	Stage IVA	YES	NO	4	Larynx	1	2.771	high	0	31.6932
TCGA-CV-7418-01	Primary Tumor	62	MALE	T4a	N2b	Stage IVA	YES	NO	4	Larynx	1	2.818	high	1	25.9397
TCGA-RS-A6TP-01	Primary Tumor	58	MALE	T2	N0	Stage II	NO	NO	4	Tonsil	1	3.031	high	0	16.9644
TCGA-CR-7368-01	Primary Tumor	54	MALE	T4a	N1	Stage IVA	YES	YES	4	Oral Cavity	2	-1.725	low	0	40.9315
TCGA-CN-5373-01	Primary Tumor	55	FEMALE	T1	N0	Stage I	YES	NO	4	Floor of mouth	2	-1.289	low	0	52.0767
TCGA-CN-5358-01	Primary Tumor	60	MALE	T2	N0	Stage II	NO	NO	4	Floor of mouth	2	-1.029	low	1	8.58082
TCGA-CQ-5325-01	Primary Tumor	65	MALE	T1	N0	Stage I	NO	NO	4	Oral Tongue	2	-0.8427	low	1	21.5014
TCGA-CN-6019-01	Primary Tumor	61	MALE	T4a	N0	Stage IVA	YES	YES	4	Oral Tongue	2	-0.8044	low	0	34.126
TCGA-CQ-A4C6-01	Primary Tumor	63	MALE	T2	N0	Stage II	NO	NO	4	Buccal Mucosa	2	-0.6222	low	0	44.4822
TCGA-CQ-6224-01	Primary Tumor	52	MALE	T2	N2b	Stage IVA	YES	YES	4	Oral Tongue	2	-0.5749	low	0	56.5808
TCGA-CR-7401-01	Primary Tumor	64	MALE	T1	N0	Stage I	NO	NO	4	Oral Tongue	2	-0.3842	low	0	35.4082
TCGA-CV-A45R-01	Primary Tumor	46	MALE	T2	N1	Stage III	YES	NO	4	Oral Tongue	2	-0.319	low	0	180.164
TCGA-CV-7432-01	Primary Tumor	79	MALE	T2	N0	Stage II	YES	NO	4	Oral Cavity	2	-0.2155	low	1	84.4932
TCGA-D6-6825-01	Primary Tumor	73	MALE	T1	N0	Stage I	NO	NO	4	Oral Tongue	2	-0.207	low	0	16.1425
TCGA-CN-4731-01	Primary Tumor	63	FEMALE	T4a	N2c	Stage IVA	NO	NO	4	Buccal Mucosa	2	-0.1252	low	1	32.811
TCGA-CN-6011-01	Primary Tumor	57	MALE	T4a	N0	Stage IVA	YES	YES	4	Alveolar Ridge	2	-0.0161	low	0	30.674
TCGA-CV-5977-01	Primary Tumor	66	MALE	T3	N2b	Stage IVA	YES	NO	4	Oral Tongue	2	0.004297	low	0	60.4932
TCGA-CN-4734-01	Primary Tumor	70	MALE	T2	N0	Stage II	YES	NO	4	Buccal Mucosa	2	0.0979	low	0	55.5616
TCGA-CX-7082-01	Primary Tumor	82	MALE	T2	N2b	Stage IVA	NO	NO	4	Oral Cavity	2	0.1158	low	1	0.361644
TCGA-F7-A50J-01	Primary Tumor	67	FEMALE	T3	N0	Stage III	YES	YES	4	Oral Tongue	2	0.2137	low	0	31.1342
TCGA-CQ-5324-01	Primary Tumor	59	MALE	T3	N0	Stage III	NO	NO	4	Floor of mouth	2	0.3025	low	0	52.3726
TCGA-CV-6952-01	Primary Tumor	65	FEMALE	T3	N2b	Stage IVA	YES	NO	4	Oral Tongue	2	0.5174	low	1	6.08219
TCGA-CQ-6218-01	Primary Tumor	52	FEMALE	T3	N2b	Stage IVA	YES	YES	4	Floor of mouth	2	0.5763	low	0	41.1945
TCGA-F7-A61S-01	Primary Tumor	62	MALE	T3	N0	Stage III	YES	NO	4	Oral Tongue	2	0.6222	low	0	18.937
TCGA-CR-7397-01	Primary Tumor	44	MALE	T3	N2b	Stage IVA	YES	YES	4	Oral Tongue	2	0.6484	low	0	24.789
TCGA-CV-5442-01	Primary Tumor	76	FEMALE	T4a	N2b	Stage IVA	NO	NO	4	Hard Palate	2	0.6591	low	0	76.5041
TCGA-CN-A642-01	Primary Tumor	57	MALE	T4a	N3	Stage IVB	NO	NO	4	Floor of mouth	2	0.7252	high	1	2.69589
TCGA-CV-6441-01	Primary Tumor	60	MALE	T3	N0	Stage III	NO	NO	4	Oral Tongue	2	0.76	high	1	9.6
TCGA-BA-5556-01	Primary Tumor	58	FEMALE	T2	N0	Stage II	NO	NO	4	Floor of mouth	2	0.7877	high	0	23.8356
TCGA-H7-7774-01	Primary Tumor	75	FEMALE	T4a	N0	Stage IVA	YES	NO	4	Oral Cavity	2	0.8511	high	0	13.3808
TCGA-CV-7434-01	Primary Tumor	64	MALE	T4a	N1	Stage IVA	NO	NO	4	Oral Cavity	2	0.9289	high	1	7.16712
TCGA-CV-A45T-01	Primary Tumor	64	FEMALE	T1	N0	Stage II	NO	NO	4	Oral Tongue	2	0.9387	high	1	159.649
TCGA-BA-A6DJ-01	Primary Tumor	62	MALE	T4a	N2c	Stage IVA	YES	YES	4	Alveolar Ridge	2	1.021	high	1	13.3808
TCGA-QK-A6IJ-01	Primary Tumor	71	MALE	T2	N1	Stage III	NO	NO	4	Floor of mouth	2	1.132	high	0	12.7233
TCGA-CN-5367-01	Primary Tumor	60	FEMALE	T4a	N2b	Stage IVA	YES	YES	4	Oral Tongue	2	1.162	high	1	11.5726
TCGA-CQ-6225-01	Primary Tumor	65	MALE	T3	N0	Stage III	NO	NO	4	Oral Tongue	2	1.196	high	1	13.2493
TCGA-D6-8569-01	Primary Tumor	52	MALE	T2	N0	Stage II	NO	NO	4	Oral Tongue	2	1.221	high	0	25.3151
TCGA-CQ-5326-01	Primary Tumor	67	MALE	T4a	N2c	Stage IVA	YES	NO	4	Alveolar Ridge	2	1.319	high	1	2.92603
TCGA-CV-6961-01	Primary Tumor	61	MALE	T2	N0	Stage II	NO	NO	4	Oral Tongue	2	1.339	high	1	2.49863
TCGA-IQ-A61H-01	Primary Tumor	76	MALE	T2	N0	Stage II	NO	NO	4	Oral Tongue	2	1.389	high	0	37.4137
TCGA-QK-A6IG-01	Primary Tumor	69	MALE	T2	N1	Stage III	YES	YES	4	Buccal Mucosa	2	1.453	high	1	7.29863
TCGA-CV-6960-01	Primary Tumor	49	MALE	T3	N0	Stage III	NO	NO	4	Oral Cavity	2	1.519	high	1	28.3397
TCGA-CV-5966-01	Primary Tumor	63	FEMALE	T4a	N1	Stage IVA	YES	NO	4	Oral Cavity	2	1.551	high	1	17.9178
TCGA-CV-7102-01	Primary Tumor	76	FEMALE	T3	N2	Stage IVA	NO	NO	4	Floor of mouth	2	1.554	high	1	1.8411
TCGA-CV-6933-01	Primary Tumor	53	MALE	T3	N1	Stage III	YES	NO	4	Oral Tongue	2	1.672	high	1	90.1151
TCGA-CQ-A4CG-01	Primary Tumor	78	FEMALE	T3	N0	Stage III	NO	NO	4	Buccal Mucosa	2	1.878	high	1	14.137
TCGA-BB-8601-01	Primary Tumor	84	MALE	T3	N1	Stage III	NO	NO	4	Floor of mouth	2	1.943	high	0	20.5151
TCGA-BA-A6D8-01	Primary Tumor	59	MALE	T4a	N2c	Stage IVA	YES	YES	4	Floor of mouth	2	1.999	high	0	27.9452
TCGA-QK-A6VB-01	Primary Tumor	66	MALE	T4a	N0	Stage IVA	YES	NO	4	Floor of mouth	2	2.038	high	0	21.074
TCGA-CQ-A4CI-01	Primary Tumor	73	MALE	T2	N1	Stage III	YES	NO	4	Buccal Mucosa	2	2.214	high	0	31.2329
TCGA-IQ-A61G-01	Primary Tumor	57	MALE	T4a	N2c	Stage IVA	YES	YES	4	Floor of mouth	2	2.594	high	0	11.8356
TCGA-CV-7429-01	Primary Tumor	55	MALE	T4a	N2b	Stage IVA	YES	NO	4	Oral Cavity	2	2.799	high	1	3.51781

## Sheet: RFS
sample	sample_type	age_at_initial_pathologic_diagnosis	gender	pathologic_T	pathologic_N	pathologic_stage	radiation_therapy	targeted_molecular_therapy	tobacco_smoking_history	anatomic_neoplasm_subdivision	OSCC=2	CHRNA5 expression	CHRNA5_SPSS	RFS	RFS_time			***tobacco_smoking_history
TCGA-BA-4074-01	Primary Tumor	69	MALE	T2	N2c	Stage IVA	YES	YES	2	Oral Tongue	2	3.034	high	1	13.0192			Lifelong Non-smoker (less than 100 cigarettes smoked in Lifetime) = 1
TCGA-BA-4075-01	Primary Tumor	49	MALE	T3	N0	Stage III	NO	NO	2	Oral Tongue	2	2.036	high	1	7.7589			Current smoker (includes daily smokers and non-daily smokers or occasional smokers) = 2
TCGA-BA-5149-01	Primary Tumor	47	MALE	T3	N2c	Stage IVA	YES	YES	2	Floor of mouth	2	1.06	low	1	12.789			Current reformed smoker for > 15 years (greater than 15 years) = 3
TCGA-BA-5151-01	Primary Tumor	72	MALE	T4a	N0	Stage IVA	YES	NO	3	Buccal Mucosa	2	0.3446	low	1	16.9973			Current reformed smoker for ≤15 years (less than or equal to 15 years) = 4
TCGA-BA-5152-01	Primary Tumor	56	MALE	T4a	N0	Stage IVA	YES	NO	1	Alveolar Ridge	2	0.2978	low	0	42.3452
TCGA-BA-5555-01	Primary Tumor	54	MALE	T3	N2c	Stage IVA	NO	NO	4	Larynx	1	1.594	high	1	8.15342
TCGA-BA-5556-01	Primary Tumor	58	FEMALE	T2	N0	Stage II	NO	NO	4	Floor of mouth	2	0.7877	low	0	23.8356
TCGA-BA-5557-01	Primary Tumor	41	FEMALE	T1	N1	Stage III	YES	YES	1	Oral Tongue	2	-1.131	low	0	20.4822
TCGA-BA-6869-01	Primary Tumor	62	MALE	T3	N0	Stage III	YES	NO	2	Larynx	1	1.767	high	0	21.1726
TCGA-BA-6873-01	Primary Tumor	28	MALE	T4a	N2b	Stage IVA	NO	NO	2	Oral Tongue	2	2.019	high	1	2.16986
TCGA-BA-7269-01	Primary Tumor	61	MALE	T2	N1	Stage III	YES	NO	2	Oral Tongue	2	1.274	high	0	41.8521
TCGA-BA-A6D8-01	Primary Tumor	59	MALE	T4a	N2c	Stage IVA	YES	YES	4	Floor of mouth	2	1.999	high	1	27.9123
TCGA-BA-A8YP-01	Primary Tumor	50	MALE	T4a	N3	Stage IVB	YES	YES	2	Oropharynx	1	1.431	high	0	16.4055
TCGA-BB-4217-01	Primary Tumor	68	MALE	T4a	N2c	Stage IVA	YES	NO	2	Larynx	1	0.5827	low	0	6.14795
TCGA-BB-4223-01	Primary Tumor	48	MALE	T2	N2b	Stage IVA	YES	YES	1	Tonsil	1	1.397	high	0	105.896
TCGA-BB-4224-01	Primary Tumor	52	MALE	T2	N2b	Stage IVA	YES	NO	1	Oral Tongue	2	2.018	high	1	5.75342
TCGA-BB-4227-01	Primary Tumor	66	MALE	T4a	N2b	Stage IVA	NO	NO	3	Hypopharynx	1	1.558	high	1	2.79452
TCGA-BB-7861-01	Primary Tumor	56	MALE	T1	N1	Stage III	YES	YES	2	Base of tongue	1	0.9558	low	0	22.4219
TCGA-BB-7862-01	Primary Tumor	67	MALE	T3	N2c	Stage IVA	YES	NO	4	Larynx	1	1.752	high	0	36.7233
TCGA-BB-7863-01	Primary Tumor	43	FEMALE	T3	N0	Stage III	NO	NO	1	Oral Tongue	2	0.5712	low	0	33.6986
TCGA-BB-7864-01	Primary Tumor	61	MALE	T2	N2c	Stage IVA	YES	YES	4	Larynx	1	0.4575	low	0	50.2027
TCGA-BB-7870-01	Primary Tumor	58	MALE	T4a	N0	Stage IVA	YES	NO	2	Larynx	1	2.437	high	0	66.2795
TCGA-BB-7871-01	Primary Tumor	64	FEMALE	T4a	N2c	Stage IVA	YES	NO	2	Base of tongue	1	0.9902	low	1	14.0712
TCGA-BB-7872-01	Primary Tumor	63	MALE	T1	N0	Stage I	YES	YES	1	Oral Tongue	2	-0.008503	low	0	38.4
TCGA-BB-8601-01	Primary Tumor	84	MALE	T3	N1	Stage III	NO	NO	4	Floor of mouth	2	1.943	high	1	20.5151
TCGA-BB-A5HU-01	Primary Tumor	47	MALE	T4	N2b	Stage IVA	YES	YES	1	Oral Cavity	2	1.119	low	0	25.7096
TCGA-BB-A5HY-01	Primary Tumor	64	MALE	T3	N2b	Stage IVA	YES	YES	2	Hypopharynx	1	3.419	high	1	7.56164
TCGA-BB-A5HZ-01	Primary Tumor	65	MALE	T4a	N1	Stage IVA	YES	YES	1	Oral Cavity	2	0.6824	low	1	14.4
TCGA-BB-A6UM-01	Primary Tumor	52	MALE	T1	N2	Stage III	YES	YES	4	Tonsil	1	0.2511	low	0	12.9205
TCGA-C9-A47Z-01	Primary Tumor	72	FEMALE	T2	N1	Stage III	NO	NO	1	Oral Tongue	2	0.0797	low	0	6.27945
TCGA-C9-A480-01	Primary Tumor	45	FEMALE	T3	N0	Stage III	YES	NO	1	Oral Tongue	2	-0.6604	low	0	12.6904
TCGA-CN-4722-01	Primary Tumor	61	FEMALE	T2	N0	Stage II	NO	NO	2	Larynx	1	0.4219	low	0	48.7562
TCGA-CN-4723-01	Primary Tumor	67	MALE	T4a	N0	Stage IVA	NO	NO	4	Larynx	1	2.091	high	0	55.8575
TCGA-CN-4725-01	Primary Tumor	60	MALE	T2	N0	Stage II	NO	NO	1	Oral Tongue	2	0.2933	low	0	38.0384
TCGA-CN-4726-01	Primary Tumor	68	MALE	T3	N2b	Stage IVA	NO	NO	2	Buccal Mucosa	2	0.4935	low	1	2.59726
TCGA-CN-4727-01	Primary Tumor	56	MALE	T4a	N0	Stage IVA	YES	YES	4	Larynx	1	1.325	high	0	51.2877
TCGA-CN-4728-01	Primary Tumor	56	MALE	T3	N2b	Stage IVA	YES	YES	2	Oral Cavity	2	-0.1257	low	0	56.6795
TCGA-CN-4730-01	Primary Tumor	62	MALE	T4a	N1	Stage IVA	NO	NO	2	Floor of mouth	2	0.7679	low	0	26.8603
TCGA-CN-4731-01	Primary Tumor	63	FEMALE	T4a	N2c	Stage IVA	NO	NO	4	Buccal Mucosa	2	-0.1252	low	0	32.811
TCGA-CN-4733-01	Primary Tumor	61	MALE	T1	N1	Stage III	NO	NO	1	Oral Tongue	2	0.361	low	0	52.1425
TCGA-CN-4734-01	Primary Tumor	70	MALE	T2	N0	Stage II	YES	NO	4	Buccal Mucosa	2	0.0979	low	0	55.5616
TCGA-CN-4735-01	Primary Tumor	52	MALE	T3	N2b	Stage IVA	YES	YES	2	Larynx	1	2.313	high	0	57.1068
TCGA-CN-4737-01	Primary Tumor	19	MALE	T2	N2b	Stage IVA	YES	YES	1	Oral Tongue	2	-0.174	low	0	20.5479
TCGA-CN-4739-01	Primary Tumor	71	MALE	T4a	N0	Stage IVA	YES	YES	4	Larynx	1	0.0761	low	1	42.8055
TCGA-CN-4742-01	Primary Tumor	48	FEMALE	T4a	N2b	Stage IVA	YES	YES	2	Oral Tongue	2	0.237	low	0	13.0521
TCGA-CN-5355-01	Primary Tumor	64	MALE	T4a	N0	Stage IVA	NO	NO	2	Larynx	1	-0.1613	low	0	42.0164
TCGA-CN-5356-01	Primary Tumor	56	MALE	T3	N0	Stage III	NO	NO	2	Larynx	1	2.314	high	0	46.3233
TCGA-CN-5358-01	Primary Tumor	60	MALE	T2	N0	Stage II	NO	NO	4	Floor of mouth	2	-1.029	low	1	4.76712
TCGA-CN-5359-01	Primary Tumor	59	MALE	T4a	N2b	Stage IVA	YES	YES	2	Floor of mouth	2	1.252	high	1	11.7041
TCGA-CN-5360-01	Primary Tumor	68	MALE	T4a	N0	Stage IVA	YES	YES	2	Larynx	1	0.2295	low	0	71.3096
TCGA-CN-5364-01	Primary Tumor	55	MALE	T4a	N2c	Stage IVA	YES	YES	2	Floor of mouth	2	-0.2924	low	0	16.2082
TCGA-CN-5366-01	Primary Tumor	51	MALE	T4a	N2c	Stage IVA	YES	YES	2	Hypopharynx	1	1.441	high	1	9.07397
TCGA-CN-5367-01	Primary Tumor	60	FEMALE	T4a	N2b	Stage IVA	YES	YES	4	Oral Tongue	2	1.162	low	0	11.5726
TCGA-CN-5369-01	Primary Tumor	90	FEMALE	T4a	N0	Stage IVA	NO	NO	2	Hard Palate	2	1.191	low	0	12.4932
TCGA-CN-5373-01	Primary Tumor	55	FEMALE	T1	N0	Stage I	YES	NO	4	Floor of mouth	2	-1.289	low	0	52.0767
TCGA-CN-5374-01	Primary Tumor	56	FEMALE	T2	N2	Stage IVA	YES	YES	2	Tonsil	1	1.268	high	1	45.0082
TCGA-CN-6010-01	Primary Tumor	53	MALE	T4a	N2c	Stage IVA	YES	YES	2	Larynx	1	1.754	high	0	50.0712
TCGA-CN-6011-01	Primary Tumor	57	MALE	T4a	N0	Stage IVA	YES	YES	4	Alveolar Ridge	2	-0.0161	low	0	30.674
TCGA-CN-6012-01	Primary Tumor	66	MALE	T3	N2c	Stage IVA	YES	YES	2	Larynx	1	0.0728	low	0	48
TCGA-CN-6013-01	Primary Tumor	56	MALE	T4a	N2b	Stage IVA	YES	YES	1	Alveolar Ridge	2	-0.3221	low	0	23.9014
TCGA-CN-6016-01	Primary Tumor	64	MALE	T4a	N1	Stage IVA	YES	YES	2	Floor of mouth	2	-1.295	low	0	47.4411
TCGA-CN-6017-01	Primary Tumor	55	MALE	T3	N2b	Stage IVA	YES	YES	3	Oral Tongue	2	-0.4802	low	0	28.0438
TCGA-CN-6018-01	Primary Tumor	85	FEMALE	T4a	N2b	Stage IVA	NO	NO	1	Oral Cavity	2	1.868	high	0	19.0685
TCGA-CN-6019-01	Primary Tumor	61	MALE	T4a	N0	Stage IVA	YES	YES	4	Oral Tongue	2	-0.8044	low	0	34.126
TCGA-CN-6020-01	Primary Tumor	58	MALE	T2	N1	Stage III	YES	NO	2	Oral Cavity	2	-0.0737	low	0	6.73973
TCGA-CN-6022-01	Primary Tumor	49	MALE	T4a	N1	Stage IVA	NO	NO	2	Larynx	1	1.669	high	0	9.23836
TCGA-CN-6023-01	Primary Tumor	73	MALE	T3	N2c	Stage IVA	YES	YES	3	Larynx	1	1.758	high	0	52.0767
TCGA-CN-6989-01	Primary Tumor	64	MALE	T3	N2c	Stage IVA	YES	YES	2	Larynx	1	1.017	low	1	29.2274
TCGA-CN-6992-01	Primary Tumor	61	MALE	T3	N2b	Stage IVA	YES	YES	2	Larynx	1	1.709	high	0	35.0466
TCGA-CN-6994-01	Primary Tumor	67	MALE	T4a	N0	Stage IVA	NO	NO	3	Oral Cavity	2	0.9074	low	0	38.8932
TCGA-CN-6995-01	Primary Tumor	78	MALE	T4a	N0	Stage IVA	NO	NO	2	Floor of mouth	2	0.8315	low	0	3.68219
TCGA-CN-6996-01	Primary Tumor	58	FEMALE	T3	N2b	Stage IVA	YES	YES	1	Oral Tongue	2	-1.237	low	1	14.6959
TCGA-CN-6997-01	Primary Tumor	66	MALE	T3	N2c	Stage IVA	YES	YES	4	Larynx	1	1.856	high	0	32.4822
TCGA-CN-6998-01	Primary Tumor	53	MALE	T3	N2b	Stage IVA	YES	YES	2	Oral Tongue	2	-2.283	low	1	8.02192
TCGA-CN-A497-01	Primary Tumor	63	MALE	T1	N1	Stage III	NO	NO	4	Larynx	1	1.107	low	0	35.0137
TCGA-CN-A498-01	Primary Tumor	61	FEMALE	T3	N0	Stage III	YES	YES	4	Base of tongue	1	1.103	low	1	18.1808
TCGA-CN-A499-01	Primary Tumor	60	FEMALE	T2	N0	Stage II	NO	NO	1	Tonsil	1	0.8489	low	0	23.5726
TCGA-CN-A49A-01	Primary Tumor	60	MALE	T4b	N0	Stage IVB	YES	YES	1	Alveolar Ridge	2	2.307	high	0	17.2932
TCGA-CN-A49B-01	Primary Tumor	71	MALE	T3	N1	Stage III	YES	NO	4	Larynx	1	1.511	high	0	29.7205
TCGA-CN-A63T-01	Primary Tumor	60	MALE	T3	N2b	Stage IVA	YES	YES	2	Larynx	1	1.617	high	0	7.39726
TCGA-CN-A63U-01	Primary Tumor	50	MALE	T3	N2b	Stage IVA	YES	NO	4	Larynx	1	2.771	high	0	31.6932
TCGA-CN-A63V-01	Primary Tumor	59	MALE	T4a	N0	Stage IVA	NO	NO	2	Buccal Mucosa	2	1.011	low	0	22.3233
TCGA-CN-A63W-01	Primary Tumor	48	FEMALE	T4a	N2c	Stage IVA	YES	YES	4	Larynx	1	1.561	high	0	12.3945
TCGA-CN-A642-01	Primary Tumor	57	MALE	T4a	N3	Stage IVB	NO	NO	4	Floor of mouth	2	0.7252	low	0	2.69589
TCGA-CN-A6UY-01	Primary Tumor	57	MALE	T3	N2b	Stage IVA	YES	YES	4	Base of tongue	1	-1.131	low	0	23.4411
TCGA-CN-A6V3-01	Primary Tumor	61	MALE	T3	N2b	Stage IVA	YES	YES	4	Larynx	1	0.1612	low	0	24.3945
TCGA-CN-A6V6-01	Primary Tumor	59	MALE	T2	N2b	Stage IVA	YES	YES	4	Base of tongue	1	-0.5179	low	0	20.8767
TCGA-CN-A6V7-01	Primary Tumor	40	MALE	T2	N2b	Stage IVA	YES	YES	1	Tonsil	1	0.9325	low	0	19.5288
TCGA-CQ-5323-01	Primary Tumor	82	MALE	T1	N0	Stage I	YES	NO	3	Alveolar Ridge	2	0.7156	low	0	48.1973
TCGA-CQ-5324-01	Primary Tumor	59	MALE	T3	N0	Stage III	NO	NO	4	Floor of mouth	2	0.3025	low	0	52.3726
TCGA-CQ-5325-01	Primary Tumor	65	MALE	T1	N0	Stage I	NO	NO	4	Oral Tongue	2	-0.8427	low	1	19.3644
TCGA-CQ-5326-01	Primary Tumor	67	MALE	T4a	N2c	Stage IVA	YES	NO	4	Alveolar Ridge	2	1.319	high	0	2.92603
TCGA-CQ-5327-01	Primary Tumor	61	FEMALE	T3	N2c	Stage IVA	YES	YES	1	Oral Tongue	2	0.5165	low	0	54.5753
TCGA-CQ-5329-01	Primary Tumor	46	FEMALE	T2	N0	Stage II	NO	NO	1	Oral Tongue	2	1.474	high	0	70.4548
TCGA-CQ-5330-01	Primary Tumor	69	FEMALE	T3	N2b	Stage IVA	YES	YES	3	Oral Tongue	2	0.85	low	0	62.3671
TCGA-CQ-5333-01	Primary Tumor	74	MALE	T2	N0	Stage II	NO	NO	3	Oral Tongue	2	0.4534	low	1	5.7863
TCGA-CQ-5334-01	Primary Tumor	87	MALE	T3	N2b	Stage IVA	NO	NO	3	Buccal Mucosa	2	1.469	high	1	1.64384
TCGA-CQ-6218-01	Primary Tumor	52	FEMALE	T3	N2b	Stage IVA	YES	YES	4	Floor of mouth	2	0.5763	low	0	41.1945
TCGA-CQ-6219-01	Primary Tumor	50	FEMALE	T3	N2a	Stage IVA	NO	NO	2	Oral Tongue	2	0.8561	low	1	6.41096
TCGA-CQ-6220-01	Primary Tumor	69	MALE	T3	N0	Stage III	NO	NO	1	Buccal Mucosa	2	-1.204	low	0	32.3836
TCGA-CQ-6222-01	Primary Tumor	63	MALE	T2	N2b	Stage IVA	YES	YES	3	Oral Tongue	2	0.4175	low	0	66.2795
TCGA-CQ-6223-01	Primary Tumor	69	MALE	T2	N0	Stage II	NO	NO	3	Alveolar Ridge	2	-0.4775	low	0	46.9479
TCGA-CQ-6224-01	Primary Tumor	52	MALE	T2	N2b	Stage IVA	YES	YES	4	Oral Tongue	2	-0.5749	low	0	56.5808
TCGA-CQ-6225-01	Primary Tumor	65	MALE	T3	N0	Stage III	NO	NO	4	Oral Tongue	2	1.196	high	1	5.91781
TCGA-CQ-6227-01	Primary Tumor	77	MALE	T3	N2c	Stage IVA	NO	NO	3	Oral Cavity	2	1.743	high	0	4.2411
TCGA-CQ-6228-01	Primary Tumor	71	FEMALE	T1	N2b	Stage IVA	YES	NO	2	Floor of mouth	2	0.6805	low	1	8.97534
TCGA-CQ-6229-01	Primary Tumor	61	MALE	T2	N0	Stage II	NO	NO	1	Oral Tongue	2	-0.993	low	0	38.7616
TCGA-CQ-7065-01	Primary Tumor	40	MALE	T2	N0	Stage II	NO	NO	1	Oral Tongue	2	0.2384	low	0	53.5233
TCGA-CQ-7068-01	Primary Tumor	80	FEMALE	T2	N0	Stage II	NO	NO	1	Floor of mouth	2	-0.3224	low	1	37.7425
TCGA-CQ-7069-01	Primary Tumor	77	FEMALE	T2	N0	Stage II	NO	NO	1	Alveolar Ridge	2	-0.6371	low	0	41.8849
TCGA-CQ-7071-01	Primary Tumor	76	FEMALE	T2	N1	Stage III	YES	NO	1	Oral Cavity	2	0.8716	low	0	43.1014
TCGA-CQ-7072-01	Primary Tumor	51	MALE	T2	N0	Stage II	YES	NO	2	Floor of mouth	2	1.129	low	0	77.5562
TCGA-CQ-A4C6-01	Primary Tumor	63	MALE	T2	N0	Stage II	NO	NO	4	Buccal Mucosa	2	-0.6222	low	0	44.4822
TCGA-CQ-A4C9-01	Primary Tumor	56	MALE	T2	N1	Stage III	YES	NO	2	Floor of mouth	2	1.891	high	1	22.5534
TCGA-CQ-A4CB-01	Primary Tumor	59	MALE	T1	N1	Stage III	NO	NO	2	Floor of mouth	2	1.462	high	0	29.3589
TCGA-CQ-A4CD-01	Primary Tumor	69	MALE	T4a	N0	Stage IVA	YES	NO	1	Oral Cavity	2	0.9321	low	0	33.6
TCGA-CQ-A4CE-01	Primary Tumor	76	FEMALE	T2	N0	Stage II	NO	NO	1	Oral Tongue	2	0.1827	low	0	29.4904
TCGA-CQ-A4CG-01	Primary Tumor	78	FEMALE	T3	N0	Stage III	NO	NO	4	Buccal Mucosa	2	1.878	high	0	14.137
TCGA-CQ-A4CH-01	Primary Tumor	58	MALE	T2	N0	Stage II	YES	YES	1	Oral Tongue	2	0.9146	low	0	12.4603
TCGA-CQ-A4CI-01	Primary Tumor	73	MALE	T2	N1	Stage III	YES	NO	4	Buccal Mucosa	2	2.214	high	0	31.2329
TCGA-CR-5249-01	Primary Tumor	35	FEMALE	T2	N0	Stage II	YES	YES	1	Tonsil	1	0.1532	low	0	37.874
TCGA-CR-6467-01	Primary Tumor	59	MALE	T2	N1	Stage III	YES	NO	4	Tonsil	1	0.9628	low	0	58.4219
TCGA-CR-6470-01	Primary Tumor	38	MALE	T2	N0	Stage II	YES	YES	1	Tonsil	1	0.2022	low	0	50.0055
TCGA-CR-6474-01	Primary Tumor	51	MALE	T2	N2b	Stage IVA	YES	NO	2	Larynx	1	2.001	high	1	7.23288
TCGA-CR-6484-01	Primary Tumor	67	FEMALE	T4a	N2	Stage IVA	YES	YES	1	Oral Cavity	2	0.9038	low	0	11.6384
TCGA-CR-6487-01	Primary Tumor	50	MALE	T1	N0	Stage I	NO	NO	4	Tonsil	1	-0.2626	low	0	7.69315
TCGA-CR-6488-01	Primary Tumor	68	FEMALE	T2	N0	Stage II	NO	NO	1	Oral Tongue	2	-0.7426	low	0	12.4603
TCGA-CR-6491-01	Primary Tumor	60	MALE	T4a	N2b	Stage IVA	YES	YES	2	Floor of mouth	2	1.2	high	1	16.4055
TCGA-CR-6492-01	Primary Tumor	78	MALE	T2	N1	Stage III	YES	NO	2	Hard Palate	2	0.3246	low	0	15.7479
TCGA-CR-6493-01	Primary Tumor	69	MALE	T3	N2b	Stage IVA	YES	YES	3	Oral Tongue	2	1.271	high	1	8.12055
TCGA-CR-7364-01	Primary Tumor	66	MALE	T3	N0	Stage III	NO	NO	2	Larynx	1	1.634	high	0	47.1781
TCGA-CR-7365-01	Primary Tumor	60	MALE	T4a	N0	Stage IVA	YES	YES	2	Oral Cavity	2	1.2	high	0	39.1562
TCGA-CR-7367-01	Primary Tumor	52	MALE	T4a	N1	Stage IVA	YES	YES	2	Oral Cavity	2	1.018	low	0	47.3425
TCGA-CR-7368-01	Primary Tumor	54	MALE	T4a	N1	Stage IVA	YES	YES	4	Oral Cavity	2	-1.725	low	0	40.9315
TCGA-CR-7369-01	Primary Tumor	59	MALE	T4a	N2b	Stage IVA	NO	NO	2	Oral Cavity	2	-1.089	low	0	35.8356
TCGA-CR-7371-01	Primary Tumor	45	FEMALE	T3	N1	Stage III	NO	NO	2	Larynx	1	1.976	high	0	3.09041
TCGA-CR-7372-01	Primary Tumor	45	MALE	T1	N0	Stage I	NO	NO	1	Oral Tongue	2	0.9315	low	0	24.9534
TCGA-CR-7373-01	Primary Tumor	66	MALE	T4a	N1	Stage IVA	YES	YES	3	Oral Cavity	2	0.5803	low	0	29.2274
TCGA-CR-7376-01	Primary Tumor	83	MALE	T2	N1	Stage III	NO	NO	3	Oral Cavity	2	-0.2801	low	0	31.9562
TCGA-CR-7379-01	Primary Tumor	78	FEMALE	T4a	N2b	Stage IVA	YES	NO	3	Oral Cavity	2	2.153	high	0	34.0603
TCGA-CR-7380-01	Primary Tumor	58	MALE	T4b	N0	Stage IVB	YES	YES	1	Oral Cavity	2	1.79	high	1	18.4438
TCGA-CR-7382-01	Primary Tumor	49	MALE	T2	N2c	Stage IVA	YES	YES	1	Oral Tongue	2	2.04	high	1	20.1863
TCGA-CR-7383-01	Primary Tumor	79	FEMALE	T1	N0	Stage I	NO	NO	2	Tonsil	1	1.463	high	1	14.926
TCGA-CR-7386-01	Primary Tumor	69	MALE	T4a	N2c	Stage IVA	YES	YES	3	Oral Cavity	2	-1.821	low	1	33.7973
TCGA-CR-7390-01	Primary Tumor	67	MALE	T4a	N0	Stage IVA	YES	NO	2	Oral Tongue	2	2.014	high	0	49.5781
TCGA-CR-7391-01	Primary Tumor	36	FEMALE	T1	N0	Stage I	NO	NO	3	Oral Tongue	2	-0.0809	low	0	30.0164
TCGA-CR-7392-01	Primary Tumor	67	FEMALE	T3	N2b	Stage IVA	YES	NO	3	Oral Tongue	2	-0.3081	low	0	46.8493
TCGA-CR-7393-01	Primary Tumor	26	MALE	T1	N1	Stage III	YES	YES	1	Oral Tongue	2	-0.903	low	0	32.6466
TCGA-CR-7394-01	Primary Tumor	70	MALE	T4a	N0	Stage IVA	YES	NO	2	Oral Tongue	2	-0.3986	low	0	44.2521
TCGA-CR-7395-01	Primary Tumor	80	FEMALE	T2	N0	Stage II	NO	NO	3	Oral Cavity	2	-0.585	low	0	30.5753
TCGA-CR-7397-01	Primary Tumor	44	MALE	T3	N2b	Stage IVA	YES	YES	4	Oral Tongue	2	0.6484	low	0	24.789
TCGA-CR-7398-01	Primary Tumor	53	FEMALE	T2	N0	Stage II	NO	NO	2	Larynx	1	2.601	high	0	5.12877
TCGA-CR-7399-01	Primary Tumor	60	FEMALE	T3	N2c	Stage IVA	YES	YES	2	Larynx	1	2.277	high	0	5.95068
TCGA-CR-7401-01	Primary Tumor	64	MALE	T1	N0	Stage I	NO	NO	4	Oral Tongue	2	-0.3842	low	0	35.4082
TCGA-CV-5430-01	Primary Tumor	61	MALE	T4a	N2a	Stage IVA	YES	NO	3	Larynx	1	0.2146	low	1	25.7425
TCGA-CV-5431-01	Primary Tumor	73	MALE	T3	N2c	Stage IVA	YES	NO	4	Larynx	1	0.2718	low	0	17.1616
TCGA-CV-5432-01	Primary Tumor	68	MALE	T3	N0	Stage III	NO	NO	4	Larynx	1	1.844	high	0	129.205
TCGA-CV-5434-01	Primary Tumor	60	MALE	T4a	N2b	Stage IVA	YES	NO	3	Larynx	1	1.654	high	1	61.1178
TCGA-CV-5435-01	Primary Tumor	57	MALE	T4a	N2b	Stage IVA	YES	YES	4	Larynx	1	1.675	high	1	9.33699
TCGA-CV-5436-01	Primary Tumor	65	MALE	T3	N2b	Stage IVA	NO	NO	2	Floor of mouth	2	0.5741	low	0	19.2
TCGA-CV-5439-01	Primary Tumor	62	MALE	T3	N2b	Stage IVA	YES	NO	2	Base of tongue	1	0.2105	low	1	6.93699
TCGA-CV-5440-01	Primary Tumor	52	MALE	T4a	N2b	Stage IVA	YES	NO	2	Larynx	1	0.2003	low	0	107.507
TCGA-CV-5441-01	Primary Tumor	58	MALE	T4a	N2b	Stage IVA	YES	NO	4	Larynx	1	0.6418	low	0	94.8822
TCGA-CV-5442-01	Primary Tumor	76	FEMALE	T4a	N2b	Stage IVA	NO	NO	4	Hard Palate	2	0.6591	low	0	76.5041
TCGA-CV-5443-01	Primary Tumor	63	MALE	T3	N0	Stage III	NO	NO	2	Larynx	1	-1.071	low	0	91.5288
TCGA-CV-5444-01	Primary Tumor	64	MALE	T4a	N1	Stage IVA	NO	NO	4	Larynx	1	-0.3203	low	0	80.1205
TCGA-CV-5966-01	Primary Tumor	63	FEMALE	T4a	N1	Stage IVA	YES	NO	4	Oral Cavity	2	1.551	high	0	17.9178
TCGA-CV-5973-01	Primary Tumor	62	FEMALE	T3	N1	Stage III	YES	NO	1	Oral Tongue	2	-0.0606	low	0	86.8274
TCGA-CV-5977-01	Primary Tumor	66	MALE	T3	N2b	Stage IVA	YES	NO	4	Oral Tongue	2	0.004297	low	0	60.4932
TCGA-CV-5979-01	Primary Tumor	26	MALE	T2	N2b	Stage IVA	YES	NO	1	Oral Tongue	2	0.2987	low	0	43.2329
TCGA-CV-6003-01	Primary Tumor	50	FEMALE	T2	N1	Stage III	NO	NO	1	Oral Tongue	2	1.906	high	0	54.7397
TCGA-CV-6433-01	Primary Tumor	57	MALE	T2	N0	Stage II	YES	YES	2	Oral Tongue	2	1.329	high	0	21.074
TCGA-CV-6436-01	Primary Tumor	62	MALE	T4a	N0	Stage IVA	NO	NO	3	Oral Tongue	2	1.537	high	0	62.4329
TCGA-CV-6441-01	Primary Tumor	60	MALE	T3	N0	Stage III	NO	NO	4	Oral Tongue	2	0.76	low	1	3.12329
TCGA-CV-6933-01	Primary Tumor	53	MALE	T3	N1	Stage III	YES	NO	4	Oral Tongue	2	1.672	high	0	90.1151
TCGA-CV-6936-01	Primary Tumor	68	MALE	T4a	N2c	Stage IVA	YES	NO	2	Floor of mouth	2	0.5937	low	1	5.16164
TCGA-CV-6940-01	Primary Tumor	80	FEMALE	T2	N1	Stage III	NO	NO	2	Buccal Mucosa	2	0.193	low	0	26.4329
TCGA-CV-6941-01	Primary Tumor	51	MALE	T3	N0	Stage III	YES	NO	2	Oral Tongue	2	1.751	high	0	11.2438
TCGA-CV-6950-01	Primary Tumor	64	MALE	T3	N2c	Stage IVA	YES	NO	4	Base of tongue	1	1.676	high	1	8.48219
TCGA-CV-6952-01	Primary Tumor	65	FEMALE	T3	N2b	Stage IVA	YES	NO	4	Oral Tongue	2	0.5174	low	0	6.08219
TCGA-CV-6953-01	Primary Tumor	80	FEMALE	T3	N0	Stage III	YES	NO	1	Floor of mouth	2	0.4027	low	1	50.0055
TCGA-CV-6956-01	Primary Tumor	67	MALE	T3	N1	Stage III	NO	NO	2	Oral Tongue	2	0.7809	low	0	7.13425
TCGA-CV-6959-01	Primary Tumor	48	MALE	T3	N0	Stage III	NO	NO	1	Oral Tongue	2	0.7848	low	1	3.3863
TCGA-CV-6960-01	Primary Tumor	49	MALE	T3	N0	Stage III	NO	NO	4	Oral Cavity	2	1.519	high	0	28.3397
TCGA-CV-6961-01	Primary Tumor	61	MALE	T2	N0	Stage II	NO	NO	4	Oral Tongue	2	1.339	high	0	2.49863
TCGA-CV-7104-01	Primary Tumor	61	FEMALE	T2	N2b	Stage IVA	NO	NO	1	Oral Tongue	2	0.1011	low	0	12.9205
TCGA-CV-7183-01	Primary Tumor	53	MALE	T2	N0	Stage II	NO	NO	3	Oral Cavity	2	-0.692	low	0	130.882
TCGA-CV-7235-01	Primary Tumor	67	MALE	T2	N0	Stage II	YES	NO	3	Floor of mouth	2	1.168	low	0	77.1616
TCGA-CV-7238-01	Primary Tumor	69	FEMALE	T2	N0	Stage II	YES	NO	1	Oral Tongue	2	0.5246	low	0	89.6548
TCGA-CV-7250-01	Primary Tumor	64	MALE	T4a	N0	Stage IVA	YES	NO	3	Larynx	1	1.347	high	1	3.64932
TCGA-CV-7252-01	Primary Tumor	62	FEMALE	T4a	N0	Stage IVA	YES	NO	1	Oral Cavity	2	1.709	high	0	4.96438
TCGA-CV-7255-01	Primary Tumor	32	FEMALE	T4a	N0	Stage IVA	NO	NO	1	Oral Tongue	2	-1.446	low	0	2.10411
TCGA-CV-7261-01	Primary Tumor	57	MALE	T4a	N0	Stage IVA	YES	NO	2	Larynx	1	1.097	low	0	49.7096
TCGA-CV-7418-01	Primary Tumor	62	MALE	T4a	N2b	Stage IVA	YES	NO	4	Larynx	1	2.818	high	1	16.2411
TCGA-CV-7421-01	Primary Tumor	76	MALE	T4a	N0	Stage IVA	NO	NO	3	Larynx	1	0.9621	low	0	0.0657534
TCGA-CV-7422-01	Primary Tumor	60	FEMALE	T4a	N1	Stage IVA	YES	NO	4	Larynx	1	1.676	high	1	24.0986
TCGA-CV-7432-01	Primary Tumor	79	MALE	T2	N0	Stage II	YES	NO	4	Oral Cavity	2	-0.2155	low	0	84.4932
TCGA-CV-7433-01	Primary Tumor	49	MALE	T4a	N2b	Stage IVA	YES	YES	2	Larynx	1	1.335	high	1	14.6301
TCGA-CV-7434-01	Primary Tumor	64	MALE	T4a	N1	Stage IVA	NO	NO	4	Oral Cavity	2	0.9289	low	0	7.16712
TCGA-CV-7435-01	Primary Tumor	57	FEMALE	T3	N2b	Stage IVA	YES	NO	2	Oral Cavity	2	0.1514	low	0	153.863
TCGA-CV-A45R-01	Primary Tumor	46	MALE	T2	N1	Stage III	YES	NO	4	Oral Tongue	2	-0.319	low	0	180.164
TCGA-CV-A45T-01	Primary Tumor	64	FEMALE	T1	N0	Stage II	NO	NO	4	Oral Tongue	2	0.9387	low	0	159.649
TCGA-CV-A45U-01	Primary Tumor	59	MALE	T4	N2b	Stage IVA	YES	NO	2	Oral Cavity	2	1.625	high	0	35.474
TCGA-CV-A45V-01	Primary Tumor	87	FEMALE	T4	N0	Stage IVA	NO	NO	1	Oral Cavity	2	-0.2117	low	0	1.05205
TCGA-CV-A45W-01	Primary Tumor	75	MALE	T2	N0	Stage II	NO	NO	2	Larynx	1	1.556	high	0	45.9616
TCGA-CV-A45X-01	Primary Tumor	47	MALE	T2	N2b	Stage IVA	YES	NO	2	Floor of mouth	2	0.333	low	0	6.50959
TCGA-CV-A45Y-01	Primary Tumor	61	MALE	T4a	N0	Stage IVA	YES	NO	4	Larynx	1	0.2927	low	0	88.8658
TCGA-CV-A460-01	Primary Tumor	72	MALE	T1	N2	Stage II	YES	NO	3	Larynx	1	-1.19	low	1	46.8493
TCGA-CV-A463-01	Primary Tumor	82	FEMALE	T4a	N0	Stage IVA	NO	NO	1	Floor of mouth	2	0.008497	low	0	0.756164
TCGA-CV-A465-01	Primary Tumor	24	MALE	T3	N0	Stage III	NO	NO	1	Oral Tongue	2	0.6664	low	0	7.06849
TCGA-CV-A468-01	Primary Tumor	42	MALE	T4a	N2a	Stage IVA	YES	NO	2	Lip	1	0.6319	low	0	15.2548
TCGA-CV-A6JT-01	Primary Tumor	65	MALE	T2	N0	Stage II	YES	NO	1	Oral Tongue	2	0.5495	low	0	28.011
TCGA-CV-A6JZ-01	Primary Tumor	68	MALE	T2	N0	Stage II	YES	NO	2	Oral Cavity	2	0.0437	low	1	12.9205
TCGA-CV-A6K1-01	Primary Tumor	65	MALE	T4a	N0	Stage IVA	YES	NO	4	Larynx	1	0.0486	low	1	13.1836
TCGA-CX-7082-01	Primary Tumor	82	MALE	T2	N2b	Stage IVA	NO	NO	4	Oral Cavity	2	0.1158	low	0	0.361644
TCGA-CX-7085-01	Primary Tumor	77	FEMALE	T1	N0	Stage I	NO	NO	3	Oral Tongue	2	0.2306	low	1	3.02466
TCGA-CX-7086-01	Primary Tumor	53	MALE	T3	N1	Stage III	YES	YES	2	Floor of mouth	2	0.8052	low	0	18.8384
TCGA-CX-7219-01	Primary Tumor	47	MALE	T4a	N2c	Stage IVA	YES	YES	2	Floor of mouth	2	0.4549	low	0	34.3562
TCGA-D6-6515-01	Primary Tumor	82	FEMALE	T2	N0	Stage II	YES	NO	1	Oral Tongue	2	0.2778	low	1	6.41096
TCGA-D6-6516-01	Primary Tumor	69	MALE	T1	N0	Stage I	NO	NO	4	Lip	1	0.6542	low	0	25.4137
TCGA-D6-6823-01	Primary Tumor	50	MALE	T2	N0	Stage II	NO	NO	2	Oral Tongue	2	2.04	high	0	23.0466
TCGA-D6-6824-01	Primary Tumor	61	MALE	T4a	N0	Stage IVA	NO	NO	2	Larynx	1	-0.0797	low	0	2.53151
TCGA-D6-6825-01	Primary Tumor	73	MALE	T1	N0	Stage I	NO	NO	4	Oral Tongue	2	-0.207	low	0	16.1425
TCGA-D6-6826-01	Primary Tumor	64	FEMALE	T4a	N2b	Stage IVA	NO	NO	1	Larynx	1	0.0849	low	0	11.4411
TCGA-D6-6827-01	Primary Tumor	55	FEMALE	T1	N0	Stage I	NO	NO	2	Lip	1	1.837	high	0	18.674
TCGA-D6-8569-01	Primary Tumor	52	MALE	T2	N0	Stage II	NO	NO	4	Oral Tongue	2	1.221	high	0	25.3151
TCGA-D6-A4Z9-01	Primary Tumor	59	MALE	T2	N2	Stage IVA	YES	NO	3	Oral Tongue	2	0.1923	low	0	17.7205
TCGA-D6-A4ZB-01	Primary Tumor	61	MALE	T3	N0	Stage III	YES	NO	2	Oral Tongue	2	0.7198	low	0	12.3616
TCGA-D6-A6EK-01	Primary Tumor	67	MALE	T2	N1	Stage III	YES	YES	4	Larynx	1	0.4708	low	0	28.7671
TCGA-D6-A6EM-01	Primary Tumor	65	FEMALE	T2	N1	Stage III	YES	NO	1	Oral Tongue	2	2.613	high	0	7.6274
TCGA-F7-7848-01	Primary Tumor	47	MALE	T4a	N1	Stage IVA	YES	NO	2	Larynx	1	0.6459	low	0	37.1836
TCGA-F7-8298-01	Primary Tumor	58	MALE	T1	N0	Stage I	NO	NO	3	Larynx	1	0.6404	low	0	32.7123
TCGA-F7-8489-01	Primary Tumor	48	MALE	T2	N0	Stage II	NO	NO	2	Floor of mouth	2	1.001	low	0	21.6329
TCGA-F7-A50G-01	Primary Tumor	66	MALE	T3	N1	Stage III	YES	NO	2	Oral Tongue	2	-0.7196	low	0	20.2521
TCGA-F7-A50J-01	Primary Tumor	67	FEMALE	T3	N0	Stage III	YES	YES	4	Oral Tongue	2	0.2137	low	0	31.1342
TCGA-F7-A61S-01	Primary Tumor	62	MALE	T3	N0	Stage III	YES	NO	4	Oral Tongue	2	0.6222	low	1	7.00274
TCGA-F7-A61V-01	Primary Tumor	54	MALE	T2	N0	Stage II	NO	NO	2	Base of tongue	1	0.5018	low	0	24.9534
TCGA-F7-A620-01	Primary Tumor	47	MALE	T3	N1	Stage III	NO	NO	2	Base of tongue	1	0.2193	low	0	17.8521
TCGA-F7-A623-01	Primary Tumor	70	MALE	T1	N2b	Stage IVA	YES	NO	2	Larynx	1	0.9777	low	0	20.2521
TCGA-H7-7774-01	Primary Tumor	75	FEMALE	T4a	N0	Stage IVA	YES	NO	4	Oral Cavity	2	0.8511	low	1	8.28493
TCGA-H7-8501-01	Primary Tumor	54	MALE	T4a	N1	Stage IVA	YES	YES	2	Buccal Mucosa	2	2.191	high	0	15.1562
TCGA-H7-8502-01	Primary Tumor	50	MALE	T4a	N2b	Stage IVA	YES	YES	2	Oral Cavity	2	1.639	high	0	15.0575
TCGA-H7-A6C4-01	Primary Tumor	35	FEMALE	T2	N2b	Stage IVA	YES	YES	2	Oral Tongue	2	-0.4357	low	1	7.72603
TCGA-HD-7229-01	Primary Tumor	60	MALE	T4a	N0	Stage IVA	YES	YES	3	Larynx	1	0.9115	low	1	5.32603
TCGA-HD-7753-01	Primary Tumor	62	MALE	T1	N0	Stage I	YES	YES	2	Oropharynx	1	1.933	high	0	28.4712
TCGA-HD-7831-01	Primary Tumor	74	MALE	T2	N2	Stage IVA	YES	NO	1	Oral Tongue	2	-0.528	low	1	21.9288
TCGA-HD-7832-01	Primary Tumor	52	MALE	T4a	N0	Stage IVA	YES	NO	2	Floor of mouth	2	1.149	low	0	27.4849
TCGA-HD-8224-01	Primary Tumor	63	MALE	T3	N2c	Stage IVA	YES	YES	1	Base of tongue	1	-0.2872	low	1	5.62192
TCGA-HD-8314-01	Primary Tumor	58	MALE	T1	N1	Stage III	YES	YES	1	Base of tongue	1	-0.0218	low	0	22.0274
TCGA-HD-8634-01	Primary Tumor	51	FEMALE	T1	N0	Stage I	NO	NO	2	Oral Tongue	2	0.4083	low	0	12.6575
TCGA-HD-8635-01	Primary Tumor	61	FEMALE	T1	N1	Stage III	NO	NO	2	Oral Tongue	2	0.0527	low	0	22.8493
TCGA-HD-A633-01	Primary Tumor	74	MALE	T4a	N0	Stage IVA	YES	NO	1	Oral Cavity	2	1.726	high	1	13.7753
TCGA-HD-A6I0-01	Primary Tumor	56	MALE	T4a	N1	Stage IVA	YES	NO	3	Oral Cavity	2	1.389	high	0	6.90411
TCGA-IQ-7630-01	Primary Tumor	49	MALE	T2	N0	Stage II	YES	YES	1	Oropharynx	1	0.751	low	0	15.9452
TCGA-IQ-7631-01	Primary Tumor	60	FEMALE	T2	N0	Stage II	NO	NO	3	Buccal Mucosa	2	-1.277	low	0	38.5315
TCGA-IQ-7632-01	Primary Tumor	68	FEMALE	T4a	N0	Stage IVA	YES	NO	3	Alveolar Ridge	2	1.37	high	0	14.4986
TCGA-IQ-A61E-01	Primary Tumor	55	FEMALE	T3	N0	Stage III	YES	YES	2	Oral Tongue	2	2.525	high	0	37.7096
TCGA-IQ-A61H-01	Primary Tumor	76	MALE	T2	N0	Stage II	NO	NO	4	Oral Tongue	2	1.389	high	0	37.4137
TCGA-IQ-A61J-01	Primary Tumor	54	MALE	T2	N2b	Stage IVA	YES	YES	1	Oral Tongue	2	-0.8142	low	0	33.5671
TCGA-IQ-A61O-01	Primary Tumor	43	MALE	T2	N2b	Stage IVA	YES	YES	1	Oropharynx	1	-1.188	low	0	13.8411
TCGA-IQ-A6SG-01	Primary Tumor	61	FEMALE	T3	N0	Stage III	YES	NO	1	Oral Tongue	2	1.937	high	0	19.0356
TCGA-IQ-A6SH-01	Primary Tumor	55	MALE	T2	N1	Stage III	YES	NO	3	Oral Tongue	2	1.588	high	0	15.4849
TCGA-KU-A66S-01	Primary Tumor	69	FEMALE	T1	N1	Stage III	YES	NO	2	Larynx	1	1.346	high	1	12.789
TCGA-KU-A66T-01	Primary Tumor	53	FEMALE	T4	N0	Stage IVA	YES	NO	1	Floor of mouth	2	-0.1359	low	1	18.1479
TCGA-KU-A6H7-01	Primary Tumor	55	FEMALE	T2	N2a	Stage IVA	YES	YES	4	Tonsil	1	1.266	high	0	19.2658
TCGA-KU-A6H8-01	Primary Tumor	41	MALE	T2	N2b	Stage IVA	YES	YES	2	Oral Tongue	2	0.9513	low	1	3.61644
TCGA-MT-A51W-01	Primary Tumor	52	FEMALE	T1	N0	Stage I	YES	NO	2	Tonsil	1	0.8163	low	0	14.3671
TCGA-MT-A51X-01	Primary Tumor	30	MALE	T1	N2b	Stage IVA	YES	NO	2	Oral Tongue	2	0.5427	low	0	7.95616
TCGA-MT-A67A-01	Primary Tumor	85	FEMALE	T1	N0	Stage I	NO	NO	1	Oral Tongue	2	1.635	high	0	30.0493
TCGA-MT-A67F-01	Primary Tumor	60	FEMALE	T4	N0	Stage IVA	YES	YES	1	Oral Cavity	2	-0.6345	low	0	12.6247
TCGA-MZ-A7D7-01	Primary Tumor	51	MALE	T3	N2b	Stage IVA	YES	YES	2	Base of tongue	1	2.038	high	1	11.1452
TCGA-P3-A5Q6-01	Primary Tumor	49	MALE	T4a	N2b	Stage IVA	YES	YES	4	Tonsil	1	2.255	high	1	12.2301
TCGA-P3-A5QE-01	Primary Tumor	49	MALE	T2	N1	Stage III	YES	NO	1	Base of tongue	1	0.9239	low	0	51.2548
TCGA-P3-A6T2-01	Primary Tumor	45	MALE	T3	N2b	Stage IVA	YES	YES	1	Buccal Mucosa	2	1.916	high	0	75.5507
TCGA-P3-A6T5-01	Primary Tumor	79	FEMALE	T4a	N0	Stage IVA	NO	NO	3	Alveolar Ridge	2	-2.682	low	1	18.9699
TCGA-QK-A652-01	Primary Tumor	60	MALE	T1	N1	Stage III	YES	NO	1	Oral Tongue	2	0.1352	low	0	21.2055
TCGA-QK-A6IG-01	Primary Tumor	69	MALE	T2	N1	Stage III	YES	YES	4	Buccal Mucosa	2	1.453	high	1	5.55616
TCGA-QK-A6IH-01	Primary Tumor	65	FEMALE	T4b	N2b	Stage IVB	YES	YES	1	Alveolar Ridge	2	1.847	high	1	8.15342
TCGA-QK-A6II-01	Primary Tumor	52	MALE	T4a	N2c	Stage IVA	YES	YES	2	Floor of mouth	2	-1.301	low	1	5.7863
TCGA-QK-A6VB-01	Primary Tumor	66	MALE	T4a	N0	Stage IVA	YES	NO	4	Floor of mouth	2	2.038	high	1	20.1534
TCGA-QK-A6VC-01	Primary Tumor	62	FEMALE	T4a	N1	Stage IVA	YES	NO	4	Hypopharynx	1	1.101	low	0	19.726
TCGA-QK-A8Z7-01	Primary Tumor	59	MALE	T4a	N2c	Stage IVA	YES	YES	2	Floor of mouth	2	2.378	high	0	12.8877
TCGA-QK-A8Z9-01	Primary Tumor	56	MALE	T4a	N2b	Stage IVA	YES	YES	2	Floor of mouth	2	-1.728	low	1	6.73973
TCGA-QK-A8ZB-01	Primary Tumor	68	MALE	T4a	N0	Stage IVA	YES	NO	3	Larynx	1	0.4035	low	0	17.8192
TCGA-QK-AA3J-01	Primary Tumor	69	MALE	T1	N0	Stage I	YES	NO	4	Larynx	1	-1.52	low	0	15.3205
TCGA-RS-A6TO-01	Primary Tumor	82	FEMALE	T4	N2c	Stage IVA	YES	YES	1	Oral Cavity	2	1.192	high	1	11.1123
TCGA-RS-A6TP-01	Primary Tumor	58	MALE	T2	N0	Stage II	NO	NO	4	Tonsil	1	3.031	high	0	16.9644
TCGA-T3-A92M-01	Primary Tumor	52	MALE	T4a	N2c	Stage IVA	YES	YES	2	Larynx	1	1.602	high	1	13.7096
TCGA-T3-A92N-01	Primary Tumor	79	MALE	T2	N2c	Stage IVA	NO	NO	2	Floor of mouth	2	0.693	low	1	1.51233
TCGA-TN-A7HI-01	Primary Tumor	56	MALE	T2	N2b	Stage IVA	YES	NO	2	Tonsil	1	0.294	low	0	13.5452
TCGA-TN-A7HJ-01	Primary Tumor	51	MALE	T4a	N2b	Stage IVA	YES	YES	1	Larynx	1	1.3	high	0	13.2493
TCGA-TN-A7HL-01	Primary Tumor	59	MALE	T3	N2b	Stage IVA	YES	YES	4	Hypopharynx	1	1.703	high	0	20.3507
TCGA-UF-A719-01	Primary Tumor	54	MALE	T2	N0	Stage II	NO	NO	2	Floor of mouth	2	1.624	high	0	54.674
TCGA-UF-A71B-01	Primary Tumor	50	MALE	T4	N0	Stage IVA	YES	NO	2	Alveolar Ridge	2	0.1661	low	0	49.5123
TCGA-UF-A71D-01	Primary Tumor	54	FEMALE	T4a	N0	Stage IVA	YES	NO	2	Larynx	1	1.107	low	0	48.0329
TCGA-UF-A71E-01	Primary Tumor	63	MALE	T4a	N0	Stage IVA	YES	NO	1	Floor of mouth	2	-0.3327	low	0	49.4466
TCGA-UF-A7J9-01	Primary Tumor	75	MALE	T4a	N0	Stage IVA	YES	NO	2	Larynx	1	0.4486	low	0	44.6466
TCGA-UF-A7JA-01	Primary Tumor	66	FEMALE	T4a	N1	Stage IVA	YES	NO	2	Buccal Mucosa	2	1.677	high	0	74.4658
TCGA-UF-A7JC-01	Primary Tumor	42	MALE	T3	N2b	Stage IVA	YES	YES	2	Floor of mouth	2	0.8232	low	0	17.9507
TCGA-UF-A7JD-01	Primary Tumor	71	MALE	T4	N2b	Stage IVA	YES	NO	2	Buccal Mucosa	2	1.708	high	0	24.2959
TCGA-UF-A7JF-01	Primary Tumor	80	MALE	T4a	N2a	Stage IVA	YES	YES	2	Larynx	1	0.4665	low	0	55.4301
TCGA-UF-A7JH-01	Primary Tumor	59	MALE	T4a	N0	Stage IVA	YES	NO	4	Larynx	1	0.4809	low	0	29.4575
TCGA-UF-A7JJ-01	Primary Tumor	68	MALE	T4a	N0	Stage IVA	YES	YES	2	Larynx	1	0.7878	low	0	18.0493
TCGA-UF-A7JS-01	Primary Tumor	59	MALE	T4a	N2b	Stage IVA	YES	NO	2	Oral Tongue	2	1.115	low	1	17.063
TCGA-WA-A7H4-01	Primary Tumor	69	MALE	T2	N0	Stage II	NO	NO	2	Oral Tongue	2	1.015	low	0	14.5644
